# Supplementary material
Source: Copernicus journal article supplement (doi:10.5194/egusphere-2026-2754)
Supplement: Supplementary file 1 [file egusphere-2026-2754-supplement.pdf]

## Supplementary material

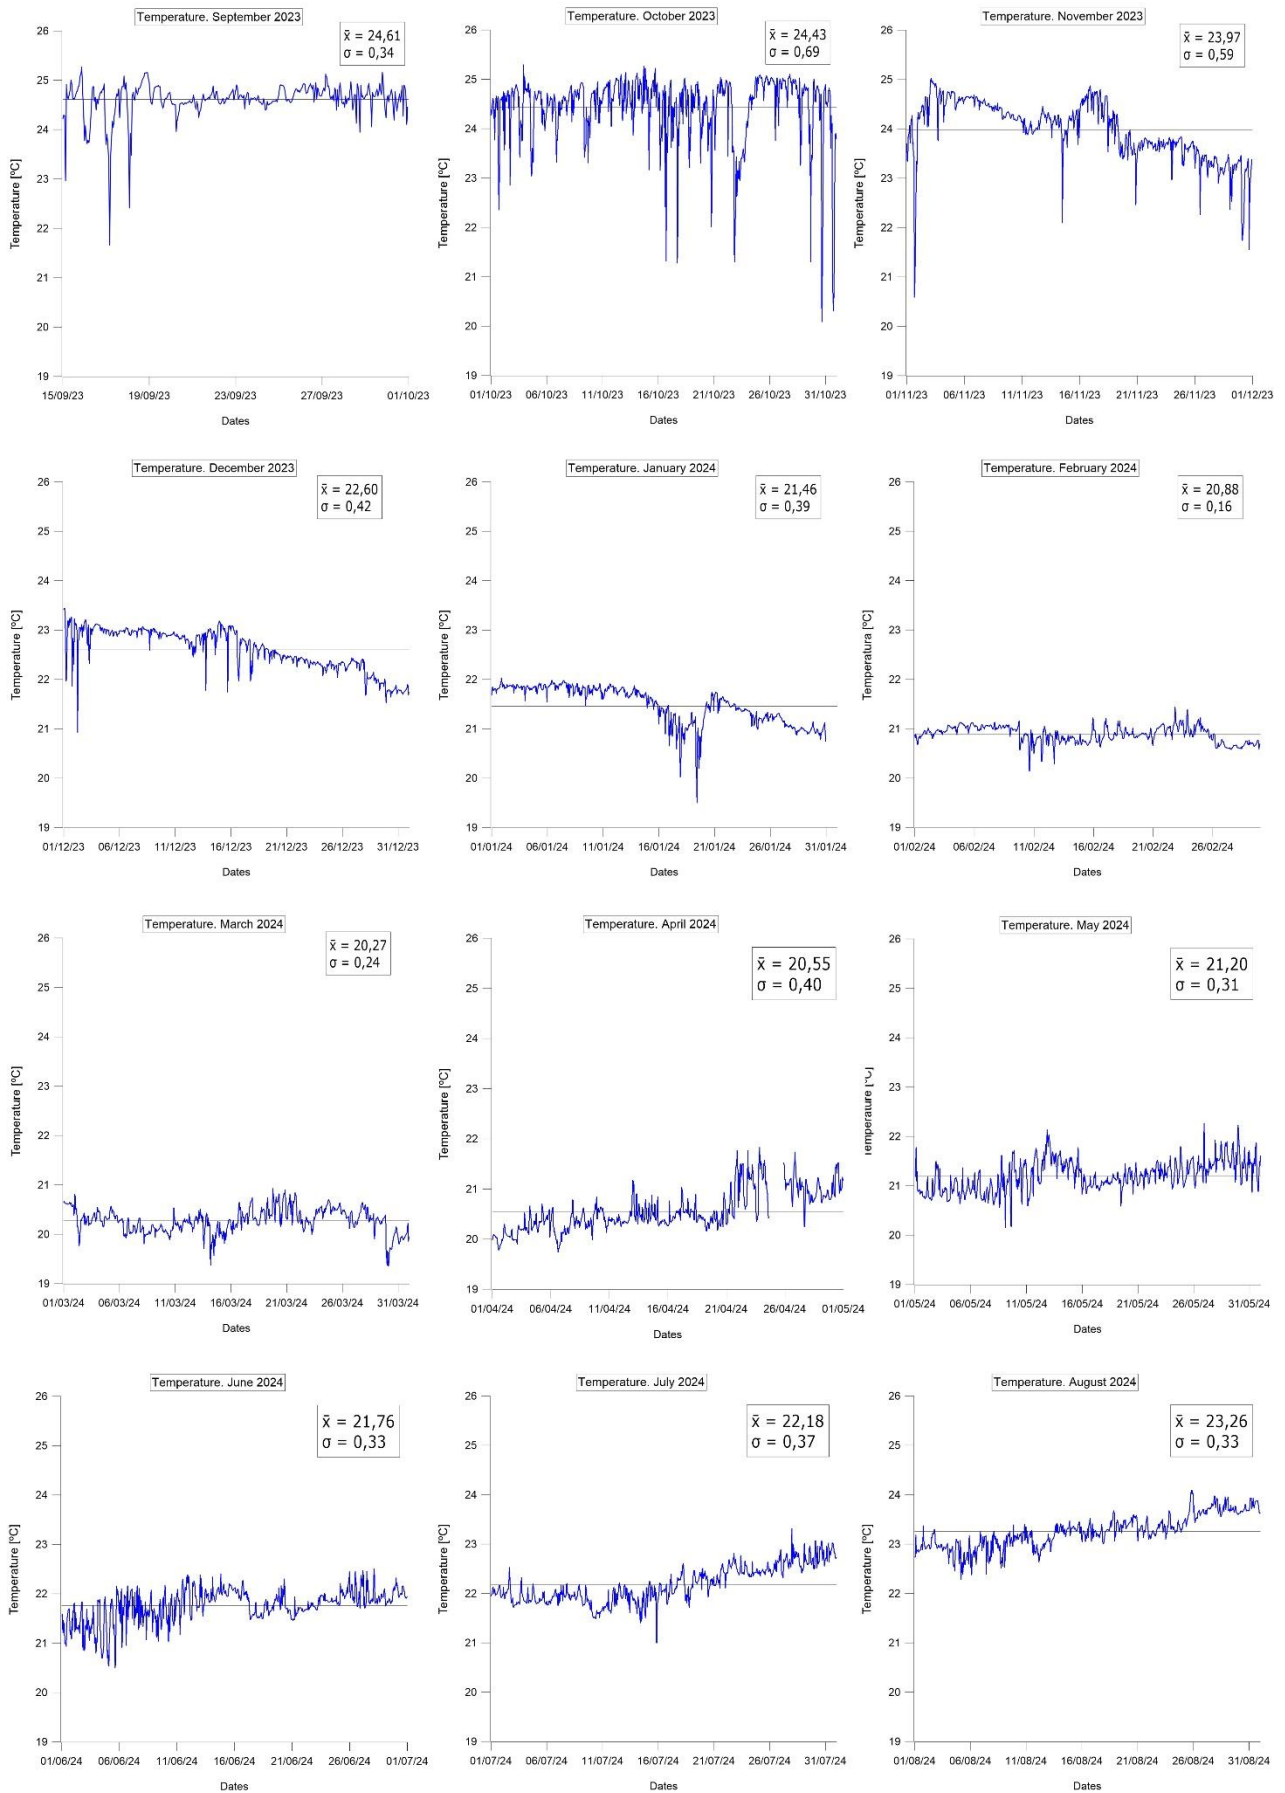

Figure S1a. Temperature measurements taken from 15 September 2023 to 10 March 2025. Each graph shows a monthly period, with a horizontal black line representing the monthly average value. Within the square, the average value and standard deviation are presented. Gaps in the line correspond to the data missing due to maintenance in April 2024 and September 2024.

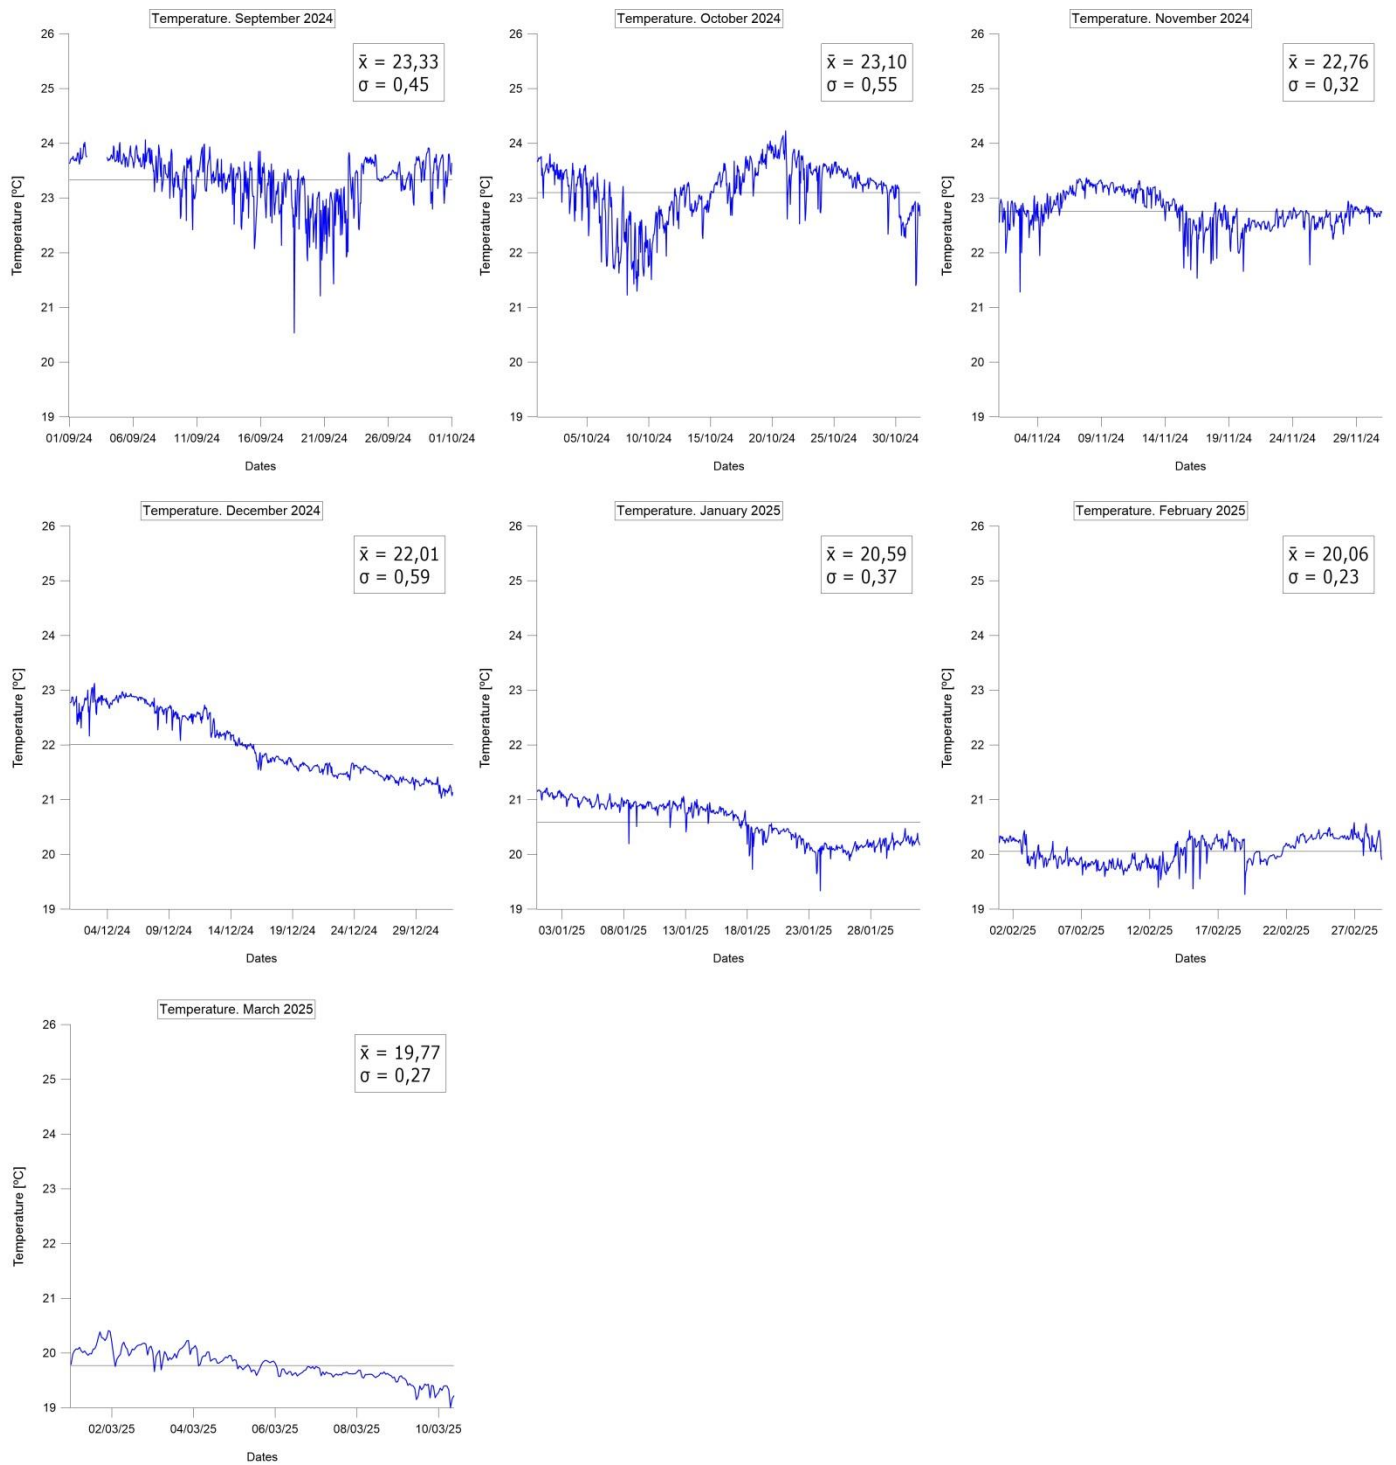

Figure S1b. Temperature measurements taken from 15 September 2023 to 10 March 2025. Each graph shows a monthly period, with a horizontal black line representing the monthly average value. Within the square, the average value and standard deviation are presented. Gaps in the line correspond to the data missing due to maintenance in April 2024 and September 2024.

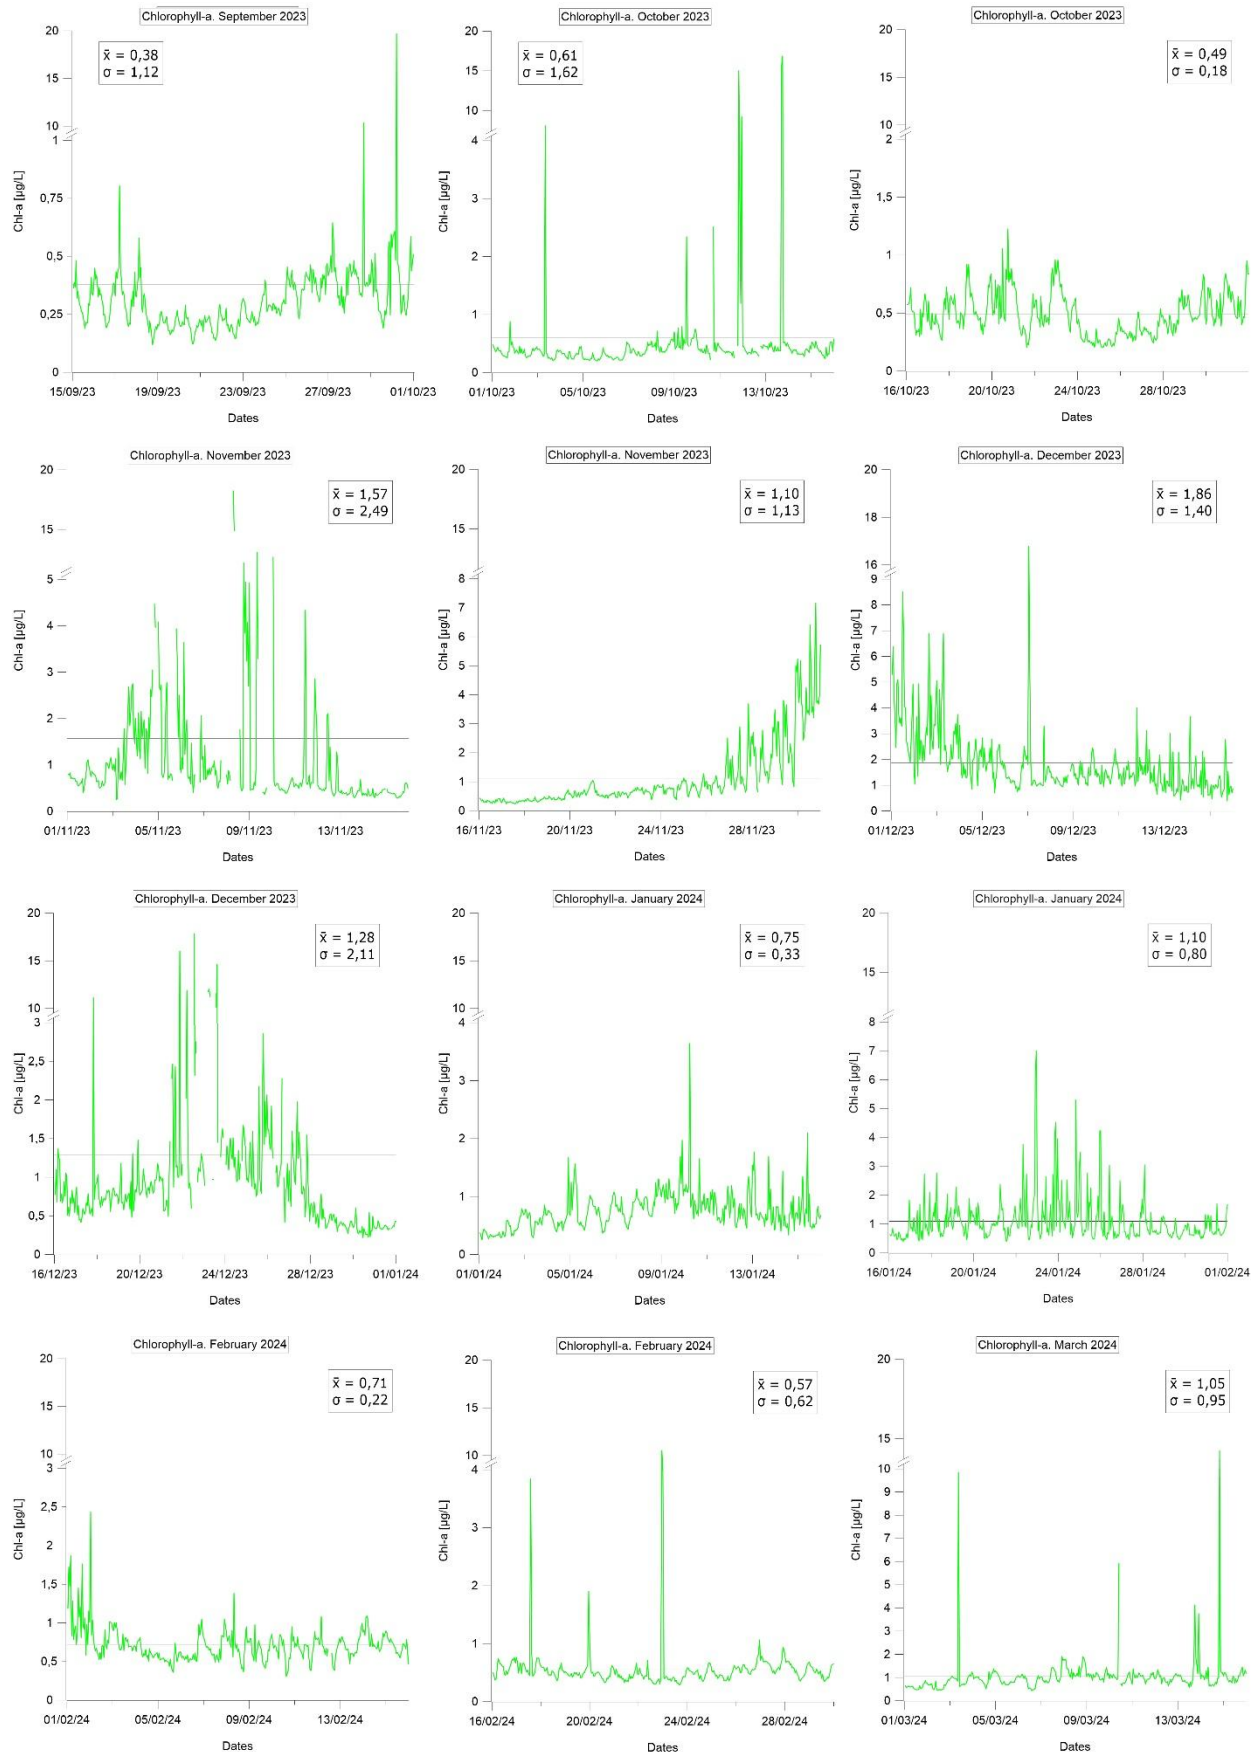

Figure S2a. Chlorophyll-a measurements taken from 15 September 2023 to 10 March 2025. Each graph shows a two-week period, with a horizontal black line representing the monthly average value. Within the square, the average value and standard deviation are presented. Gaps in the line correspond to the data removed or missing due to maintenance in April 2024 and September 2024.

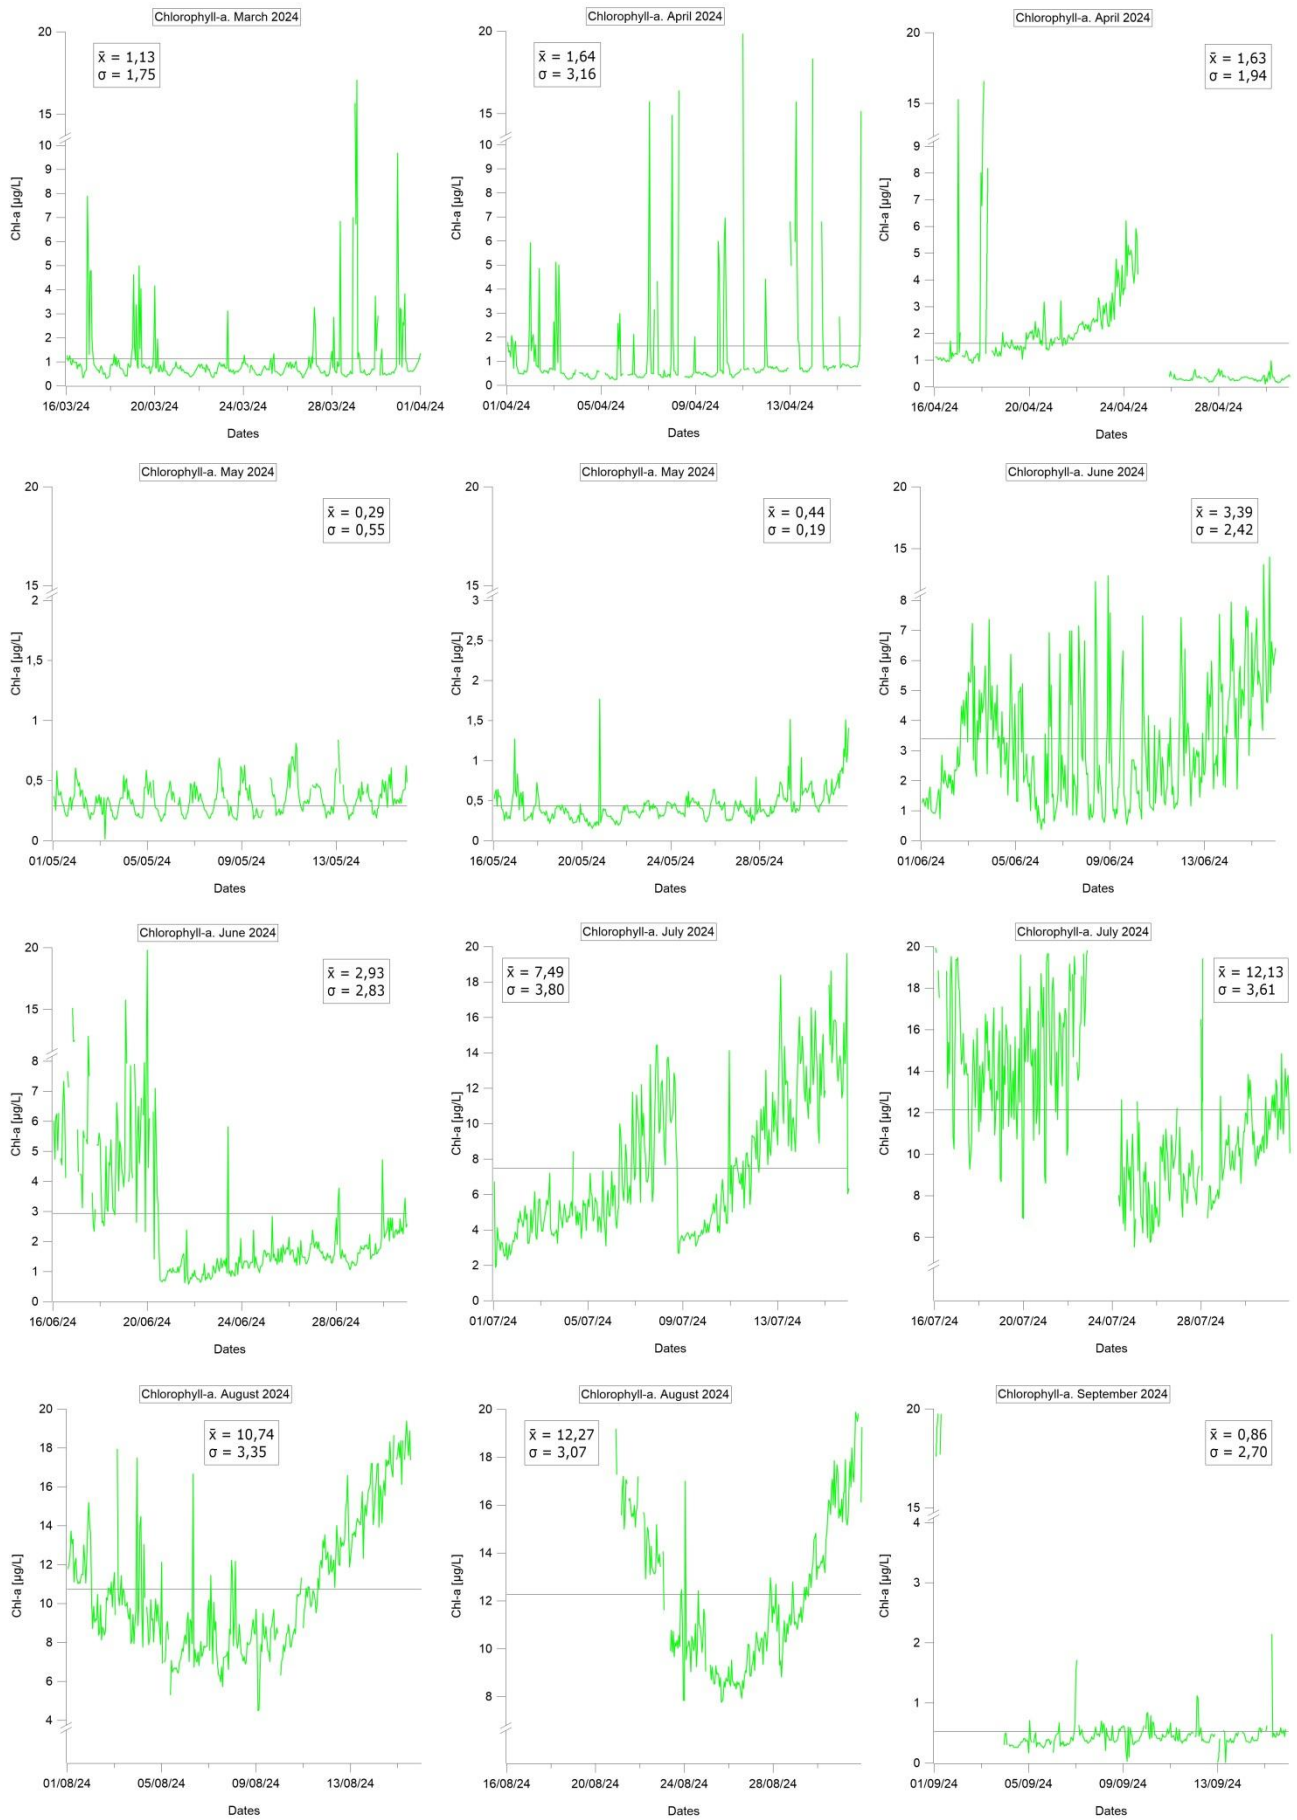

Figure S2b. Chlorophyll-a measurements taken from 15 September 2023 to 10 March 2025. Each graph shows a two-week period, with a horizontal black line representing the monthly average value. Within the square, the average value and standard deviation are presented. Gaps in the line correspond to the data removed or missing due to maintenance in April 2024 and September 2024.

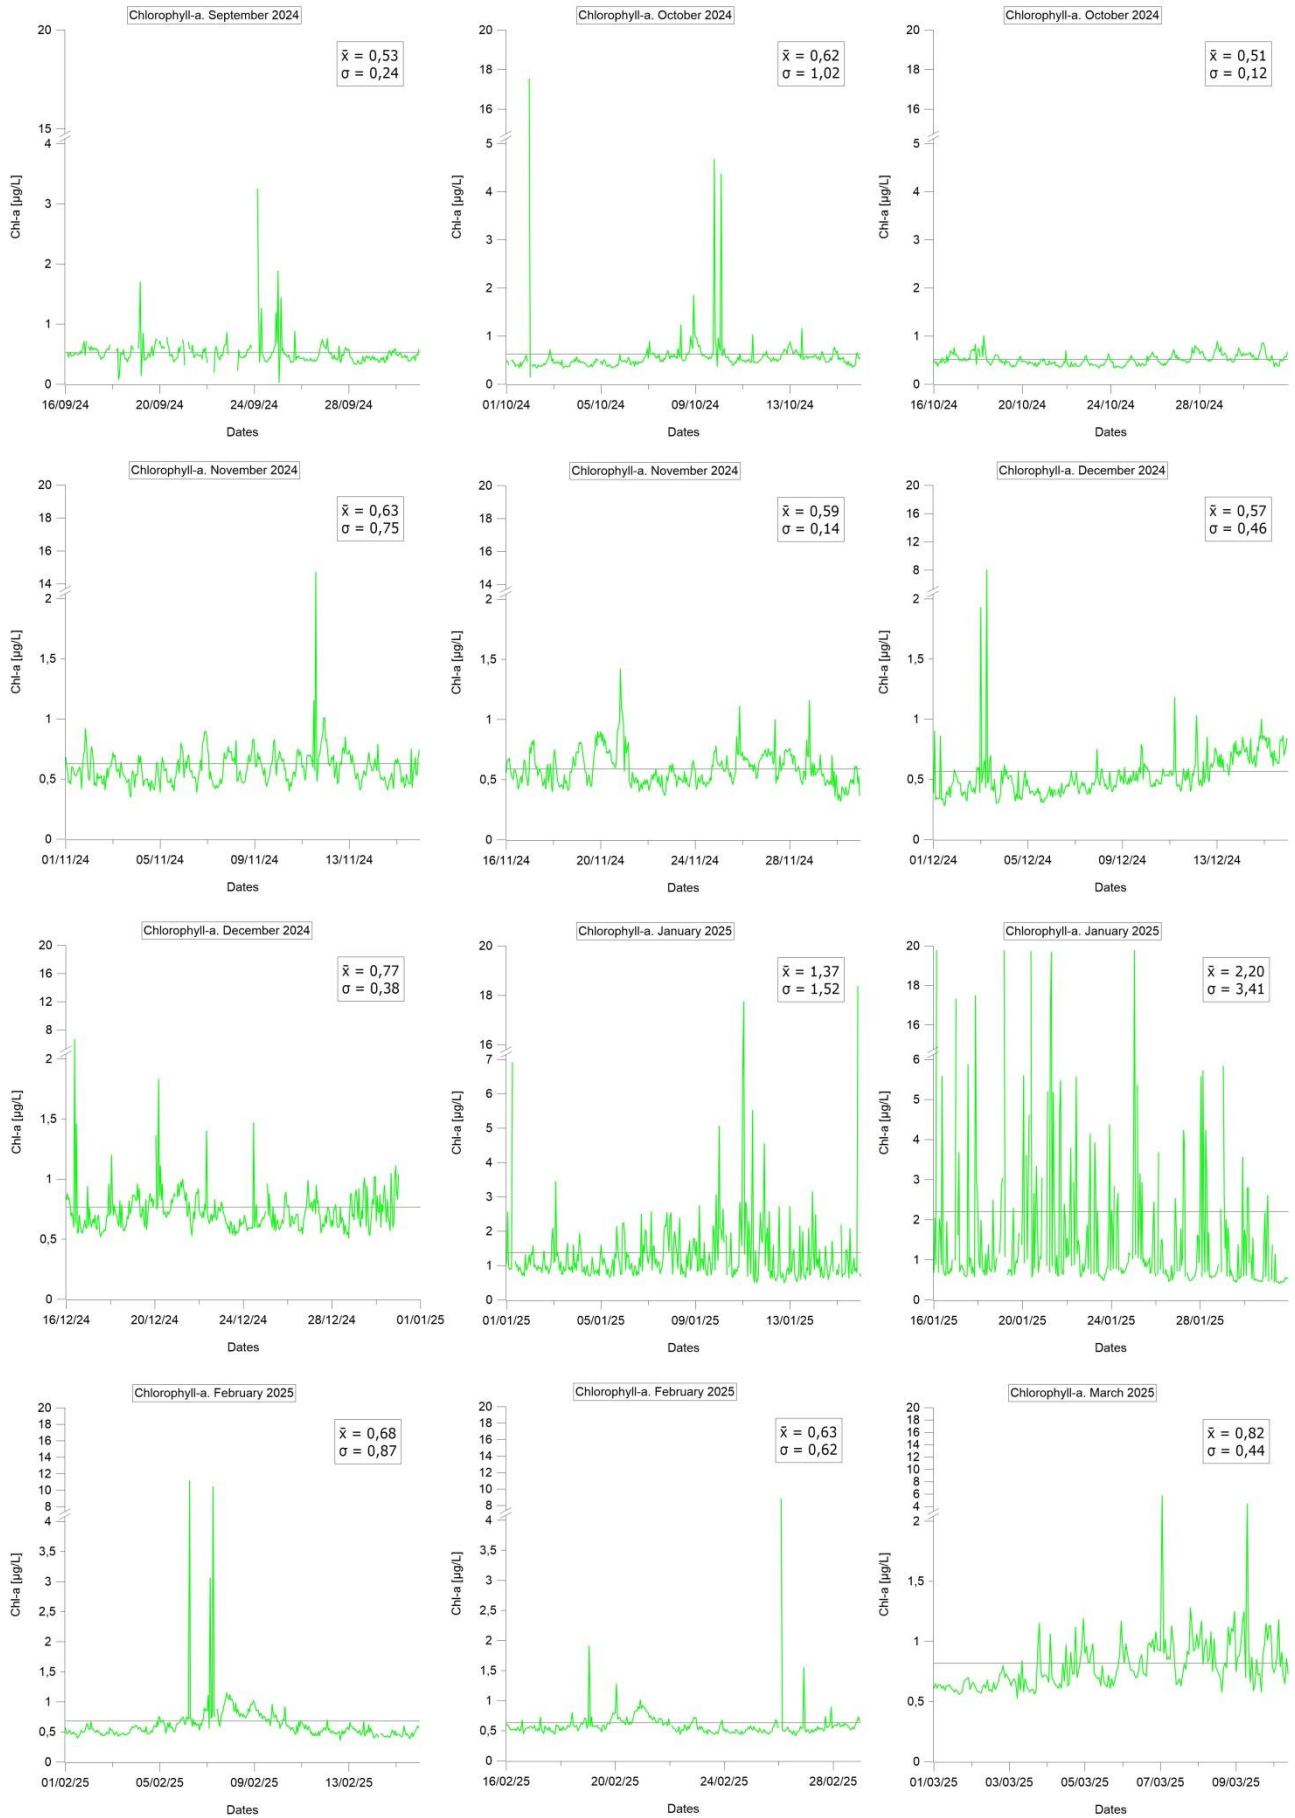

Figure S2c. Chlorophyll-a measurements taken from 15 September 2023 to 10 March 2025. Each graph shows a two-week period, with a horizontal black line representing the monthly average value. Within the square, the average value and standard deviation are presented. Gaps in the line correspond to the data removed or missing due to maintenance in April 2024 and September 2024.

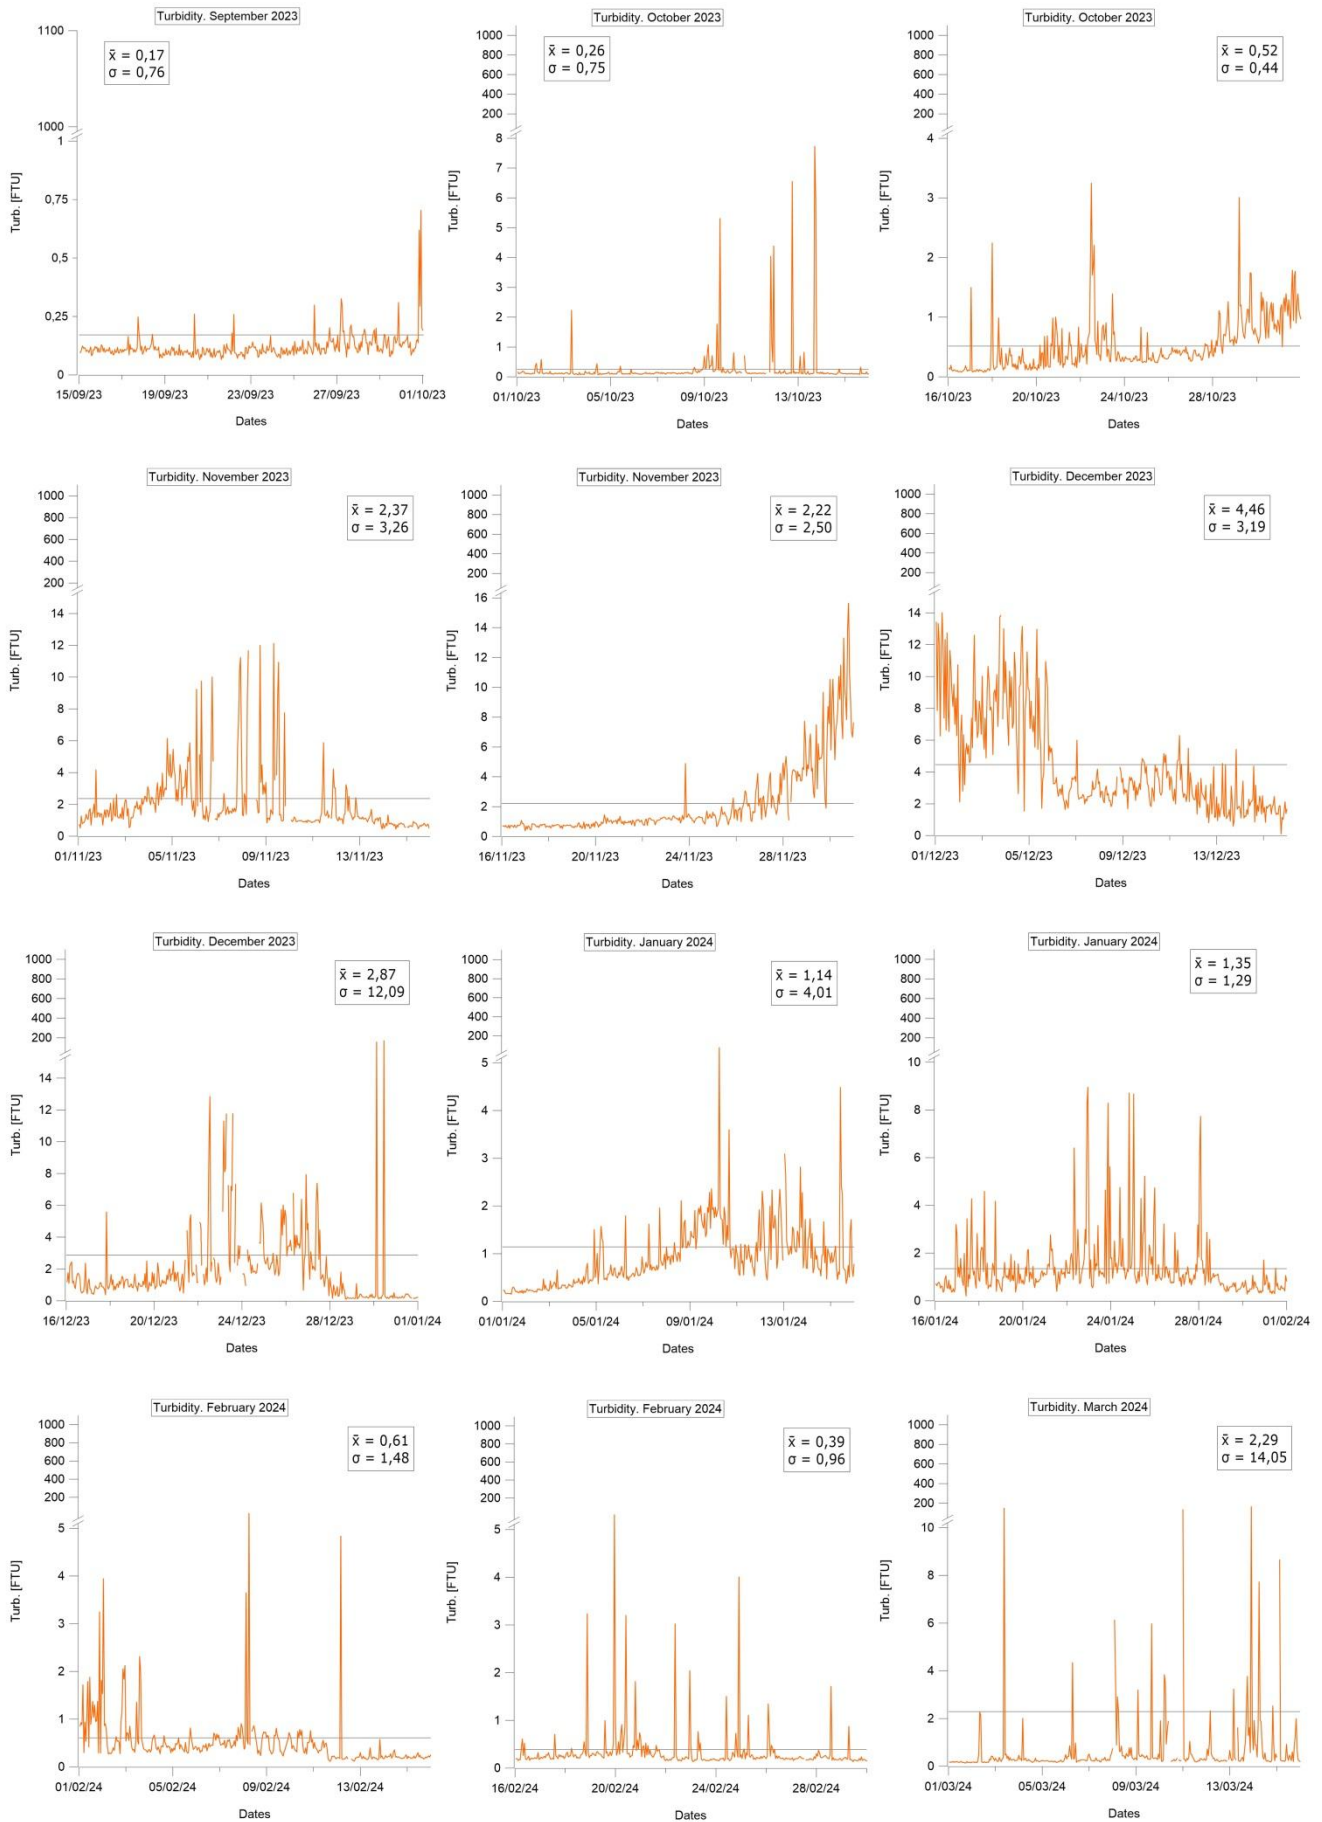

Figure S3a. Turbidity measurements taken from 15 September 2023 to 10 March 2025. Each graph shows a two-week period, with a horizontal black line representing the monthly average value. Within the square, the average value and standard deviation are presented. Gaps in the line correspond to the data removed or missing due to maintenance in April 2024 and September 2024.

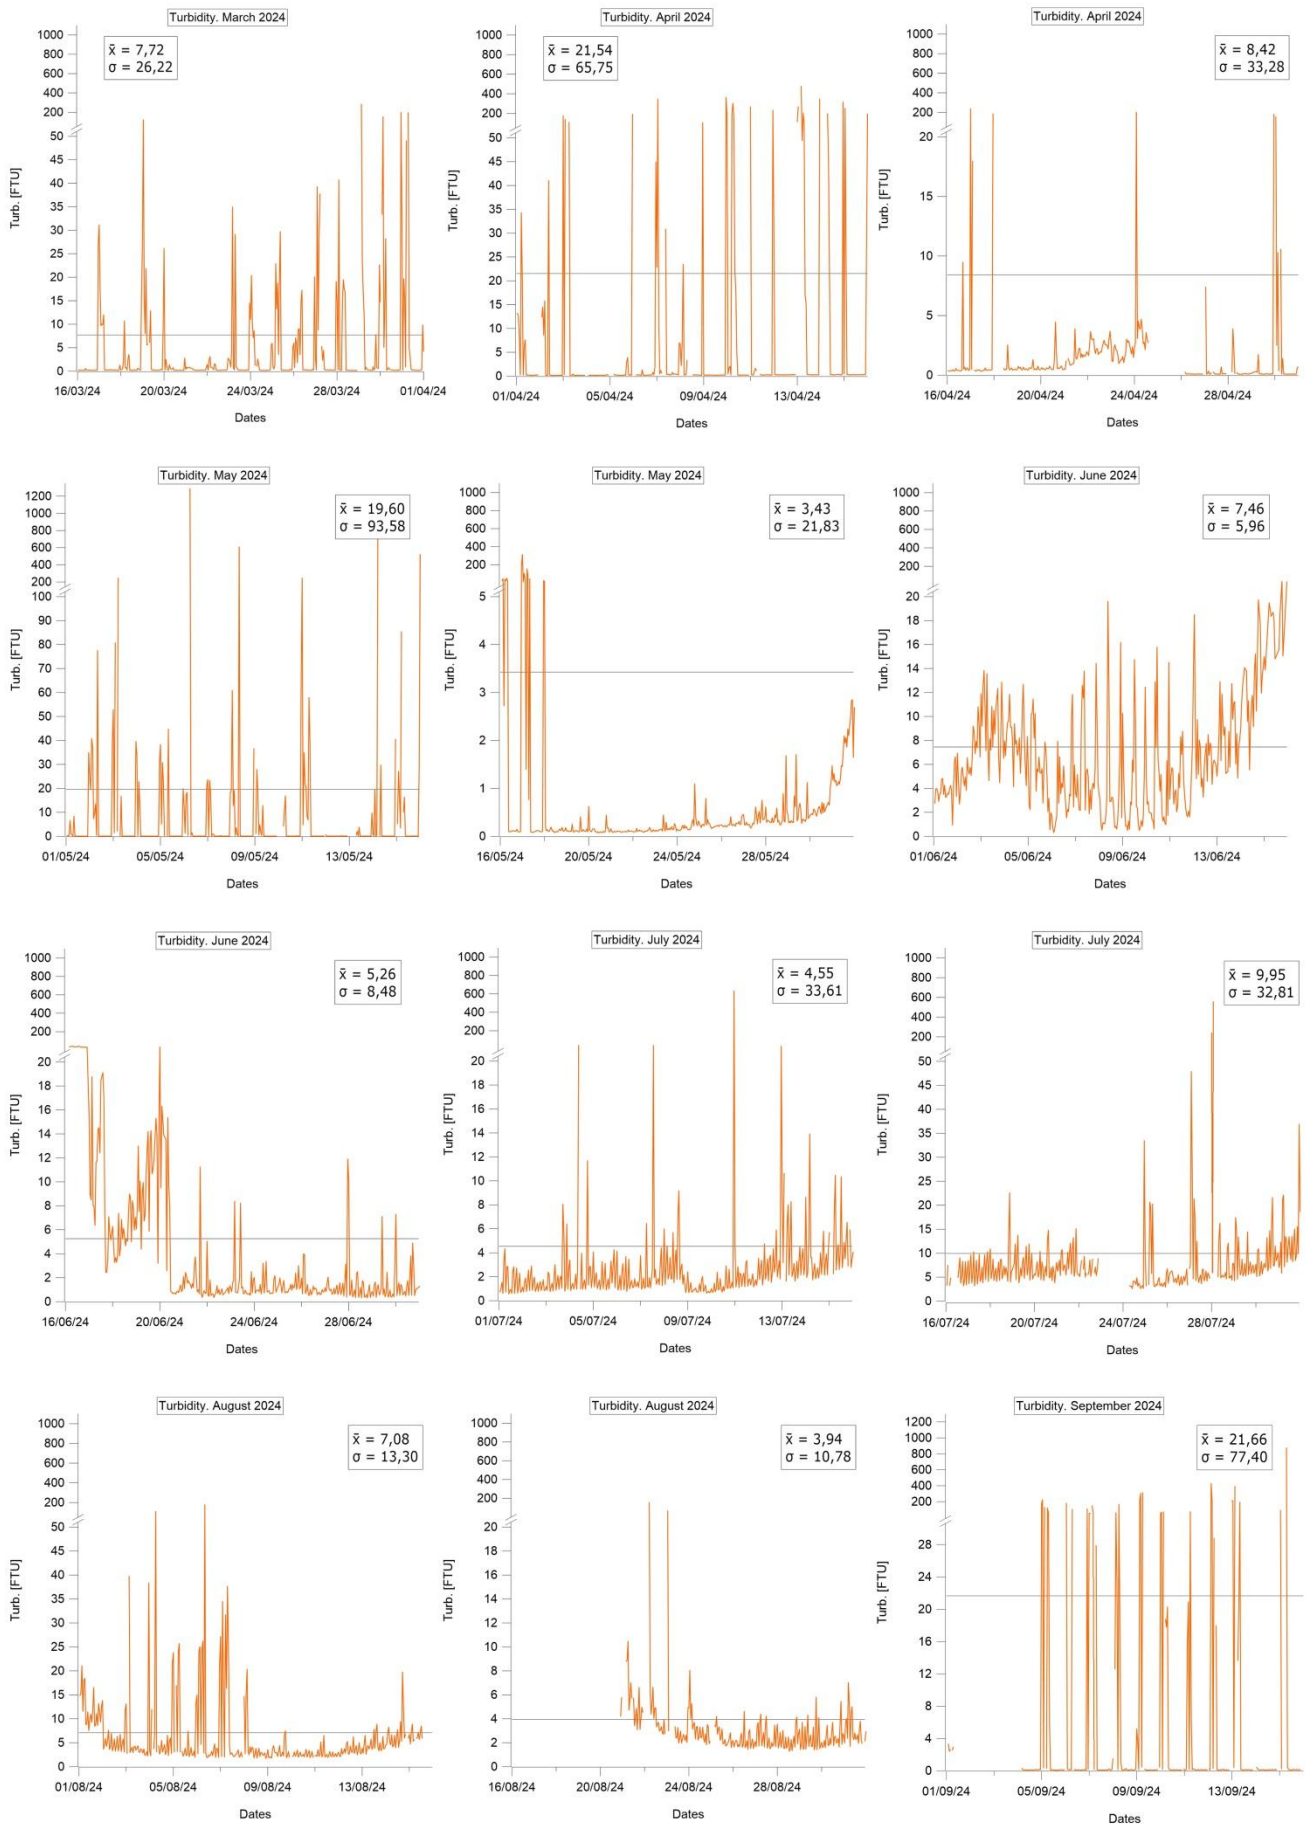

Figure S3b. Turbidity measurements taken from 15 September 2023 to 10 March 2025. Each graph shows a two-week period, with a horizontal black line representing the monthly average value. Within the square, the average value and standard deviation are presented. Gaps in the line correspond to the data removed or missing due to maintenance in April 2024 and September 2024.

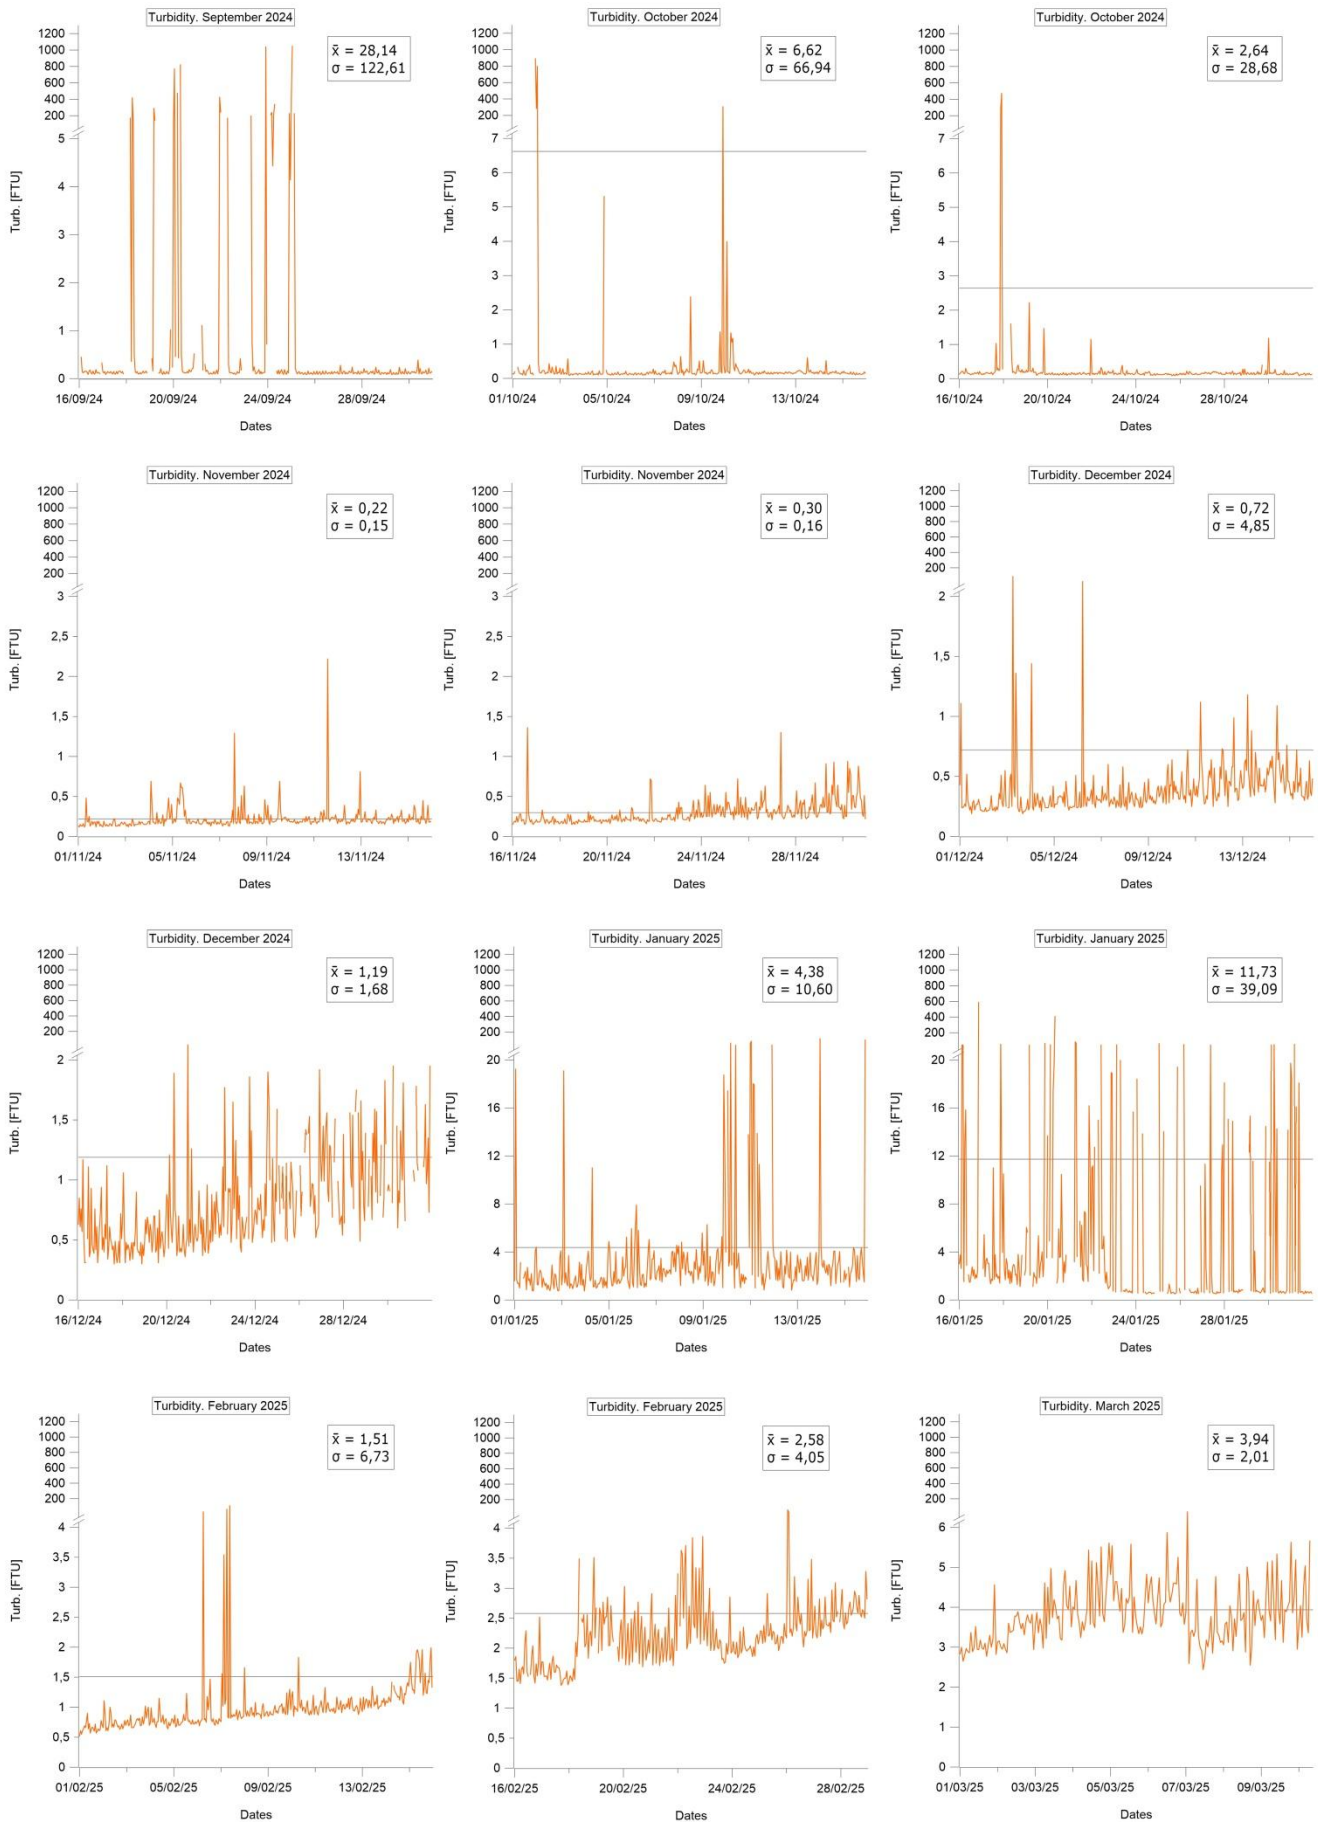

Figure S3c. Turbidity measurements taken from 15 September 2023 to 10 March 2025. Each graph shows a two-week period, with a horizontal black line representing the monthly average value. Within the square, the average value and standard deviation are presented. Gaps in the line correspond to the data removed or missing due to maintenance in April 2024 and September 2024.

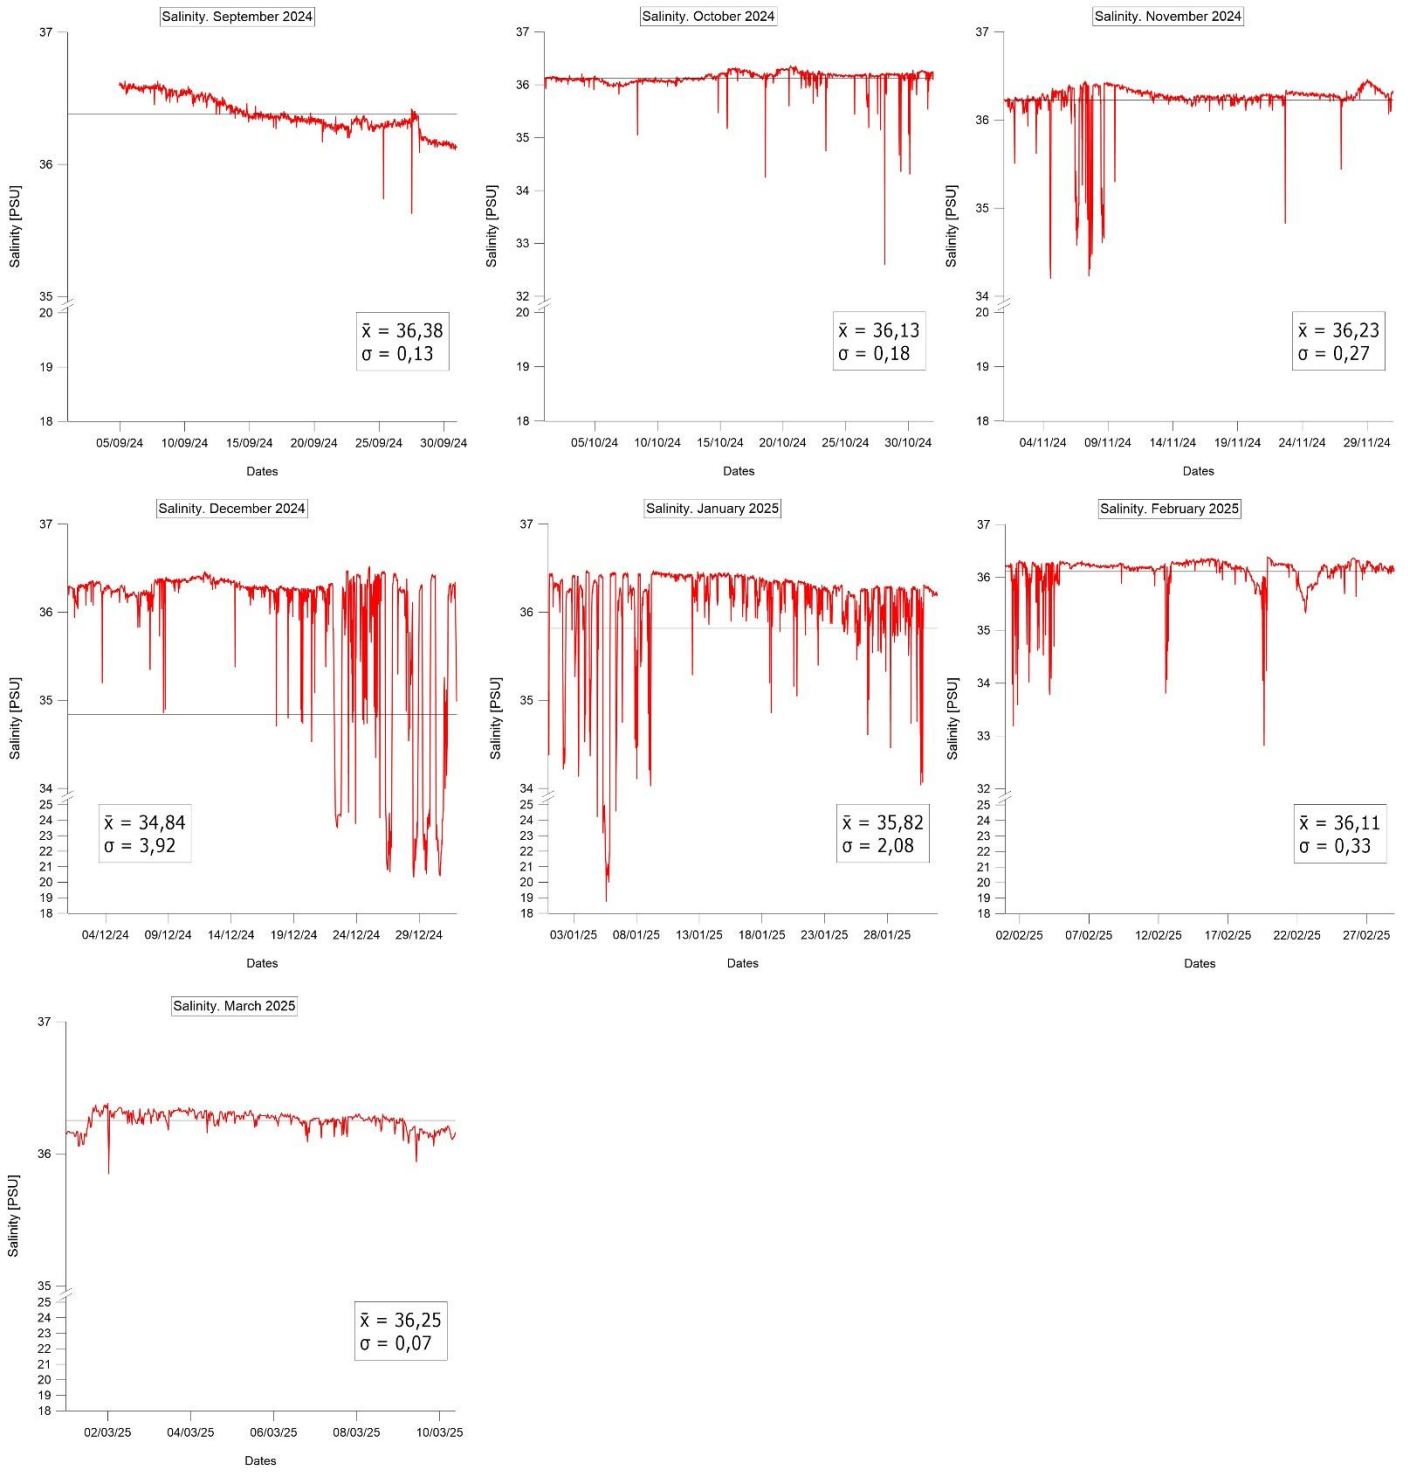

Figure S4. Salinity measurements taken from 3 September 2024 and 10 March 2025. Each graph shows a monthly period, with a horizontal black line representing the monthly average value. Within the square, the average value and standard deviation are presented.

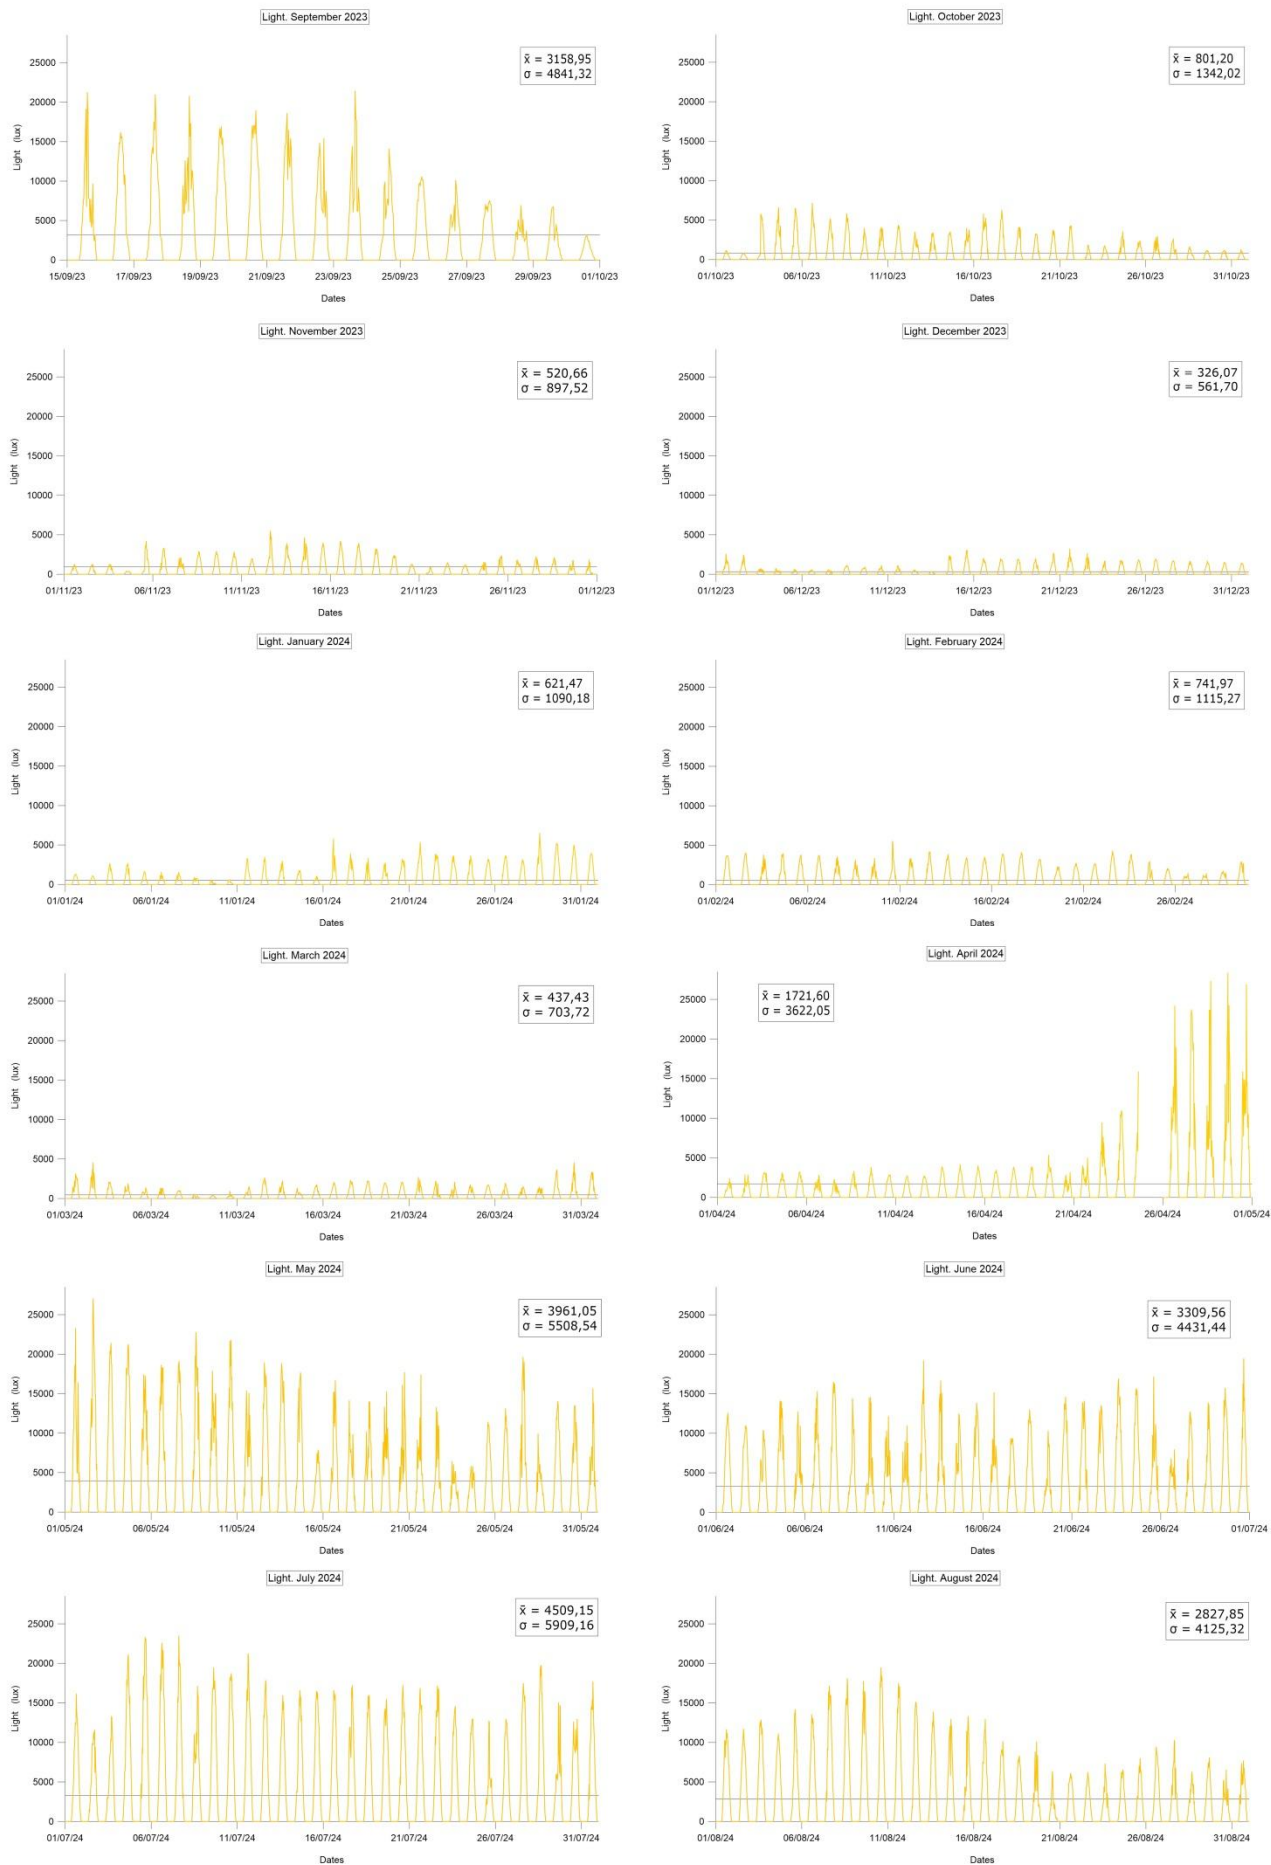

Figure S5a. Light intensity measurements taken from 15 September 2023 to 10 March 2025. Each graph shows a monthly period, with a horizontal black line representing the monthly average value. Within the square, the average value and standard deviation are presented. Gaps in the line correspond to the data removed or missing due to maintenance in April 2024 and September 2024.

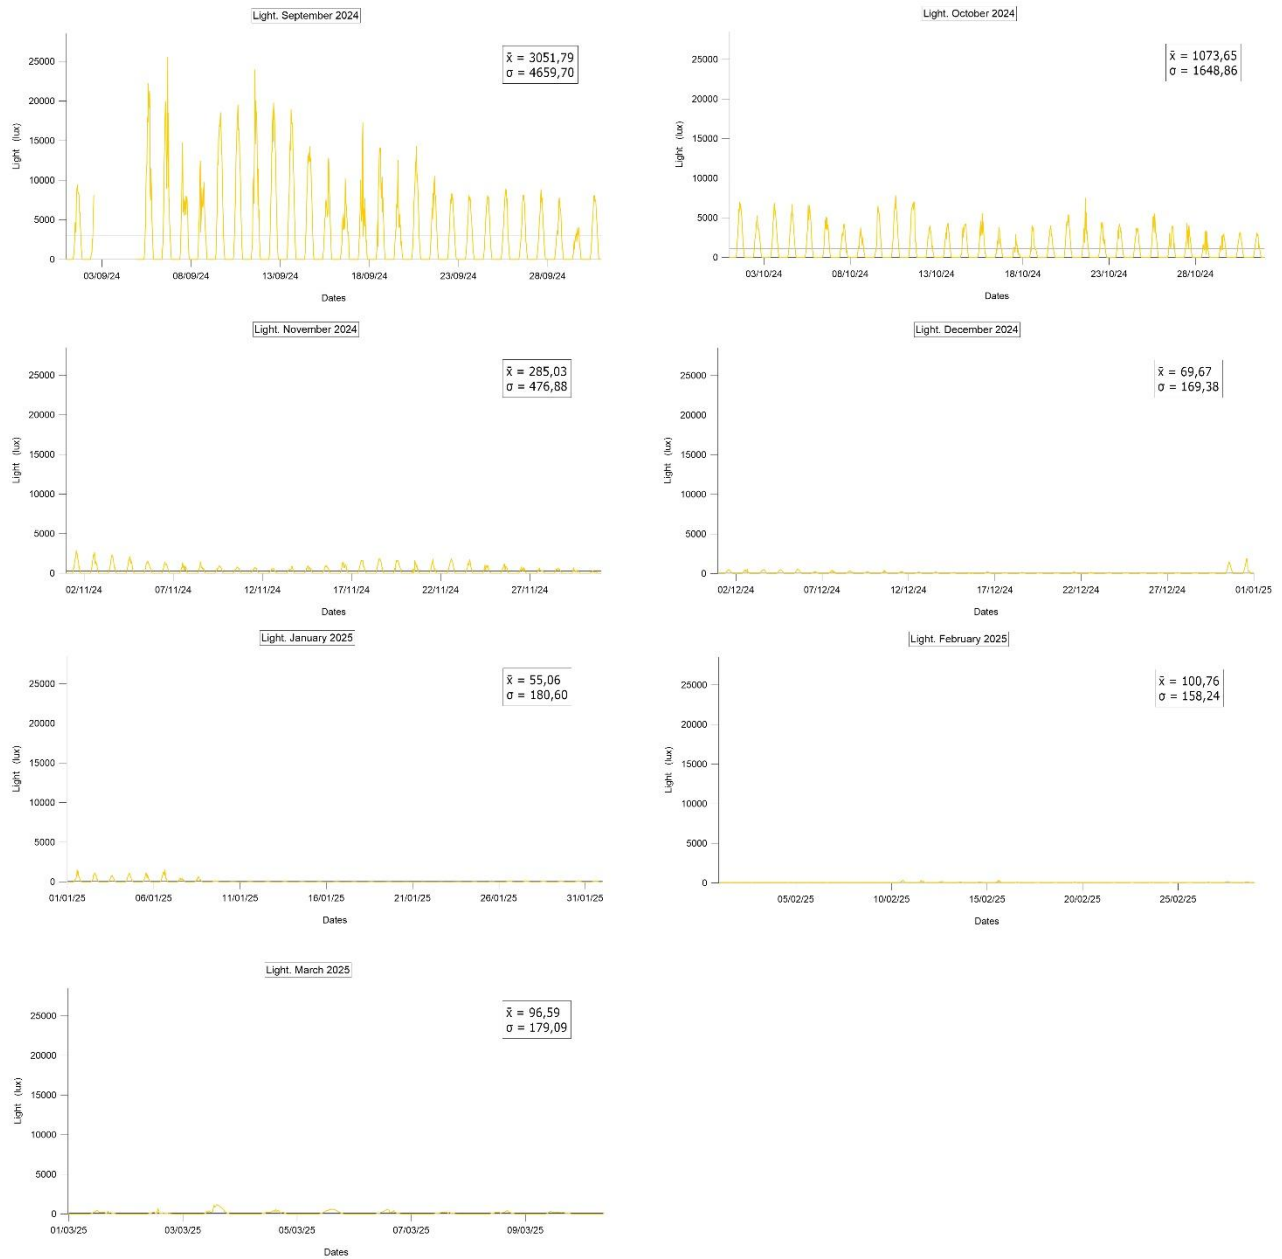

Figure S5b. Light intensity measurements taken from 15 September 2023 to 10 March 2025. Each graph shows a monthly period, with a horizontal black line representing the monthly average value. Within the square, the average value and standard deviation are presented. Gaps in the line correspond to the data removed or missing due to maintenance in April 2024 and September 2024.

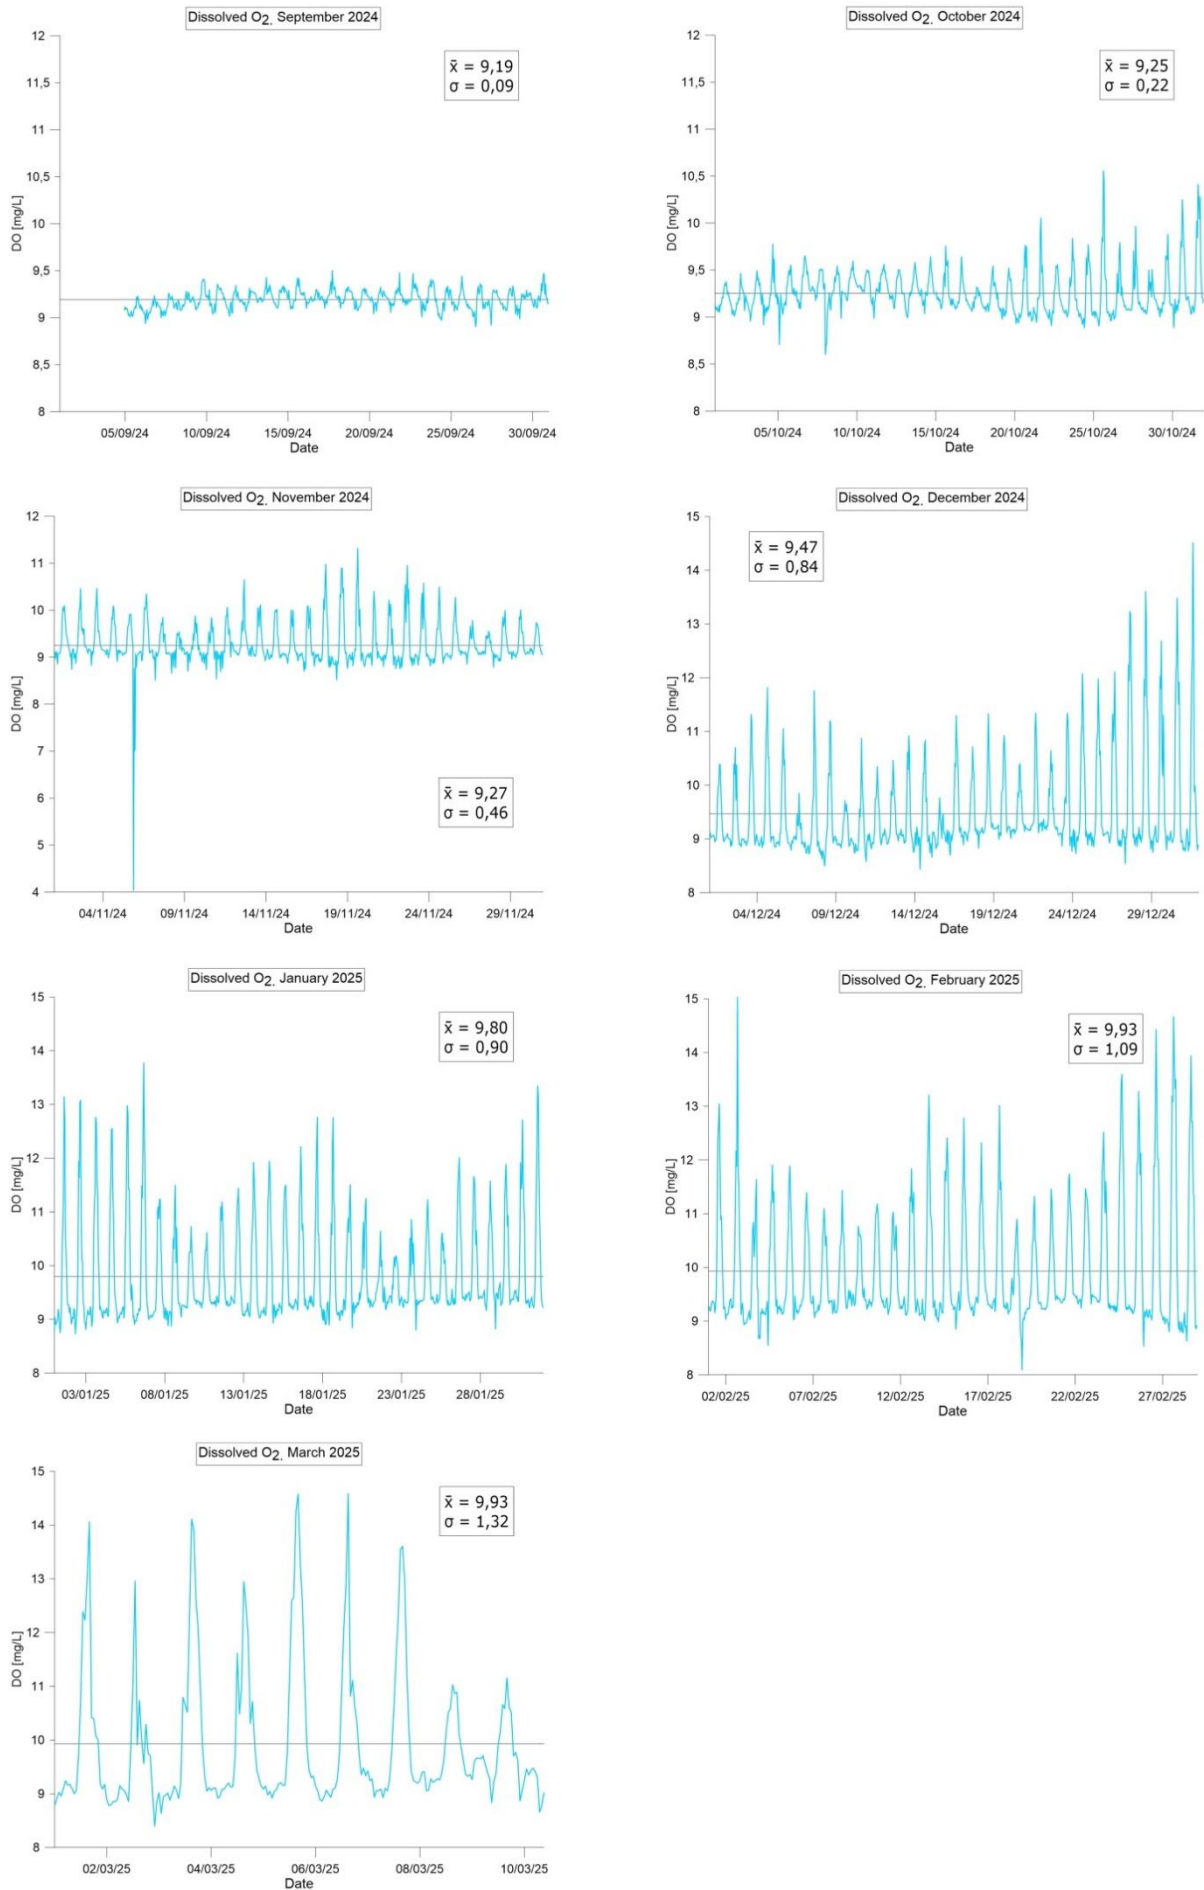

Figure S6. Dissolved O<sub>2</sub> measurements taken from 4 September 2024 to 10 March 2025. Each graph shows a monthly period, with a horizontal black line representing the monthly average value. Within the square, the average value and standard deviation are presented.

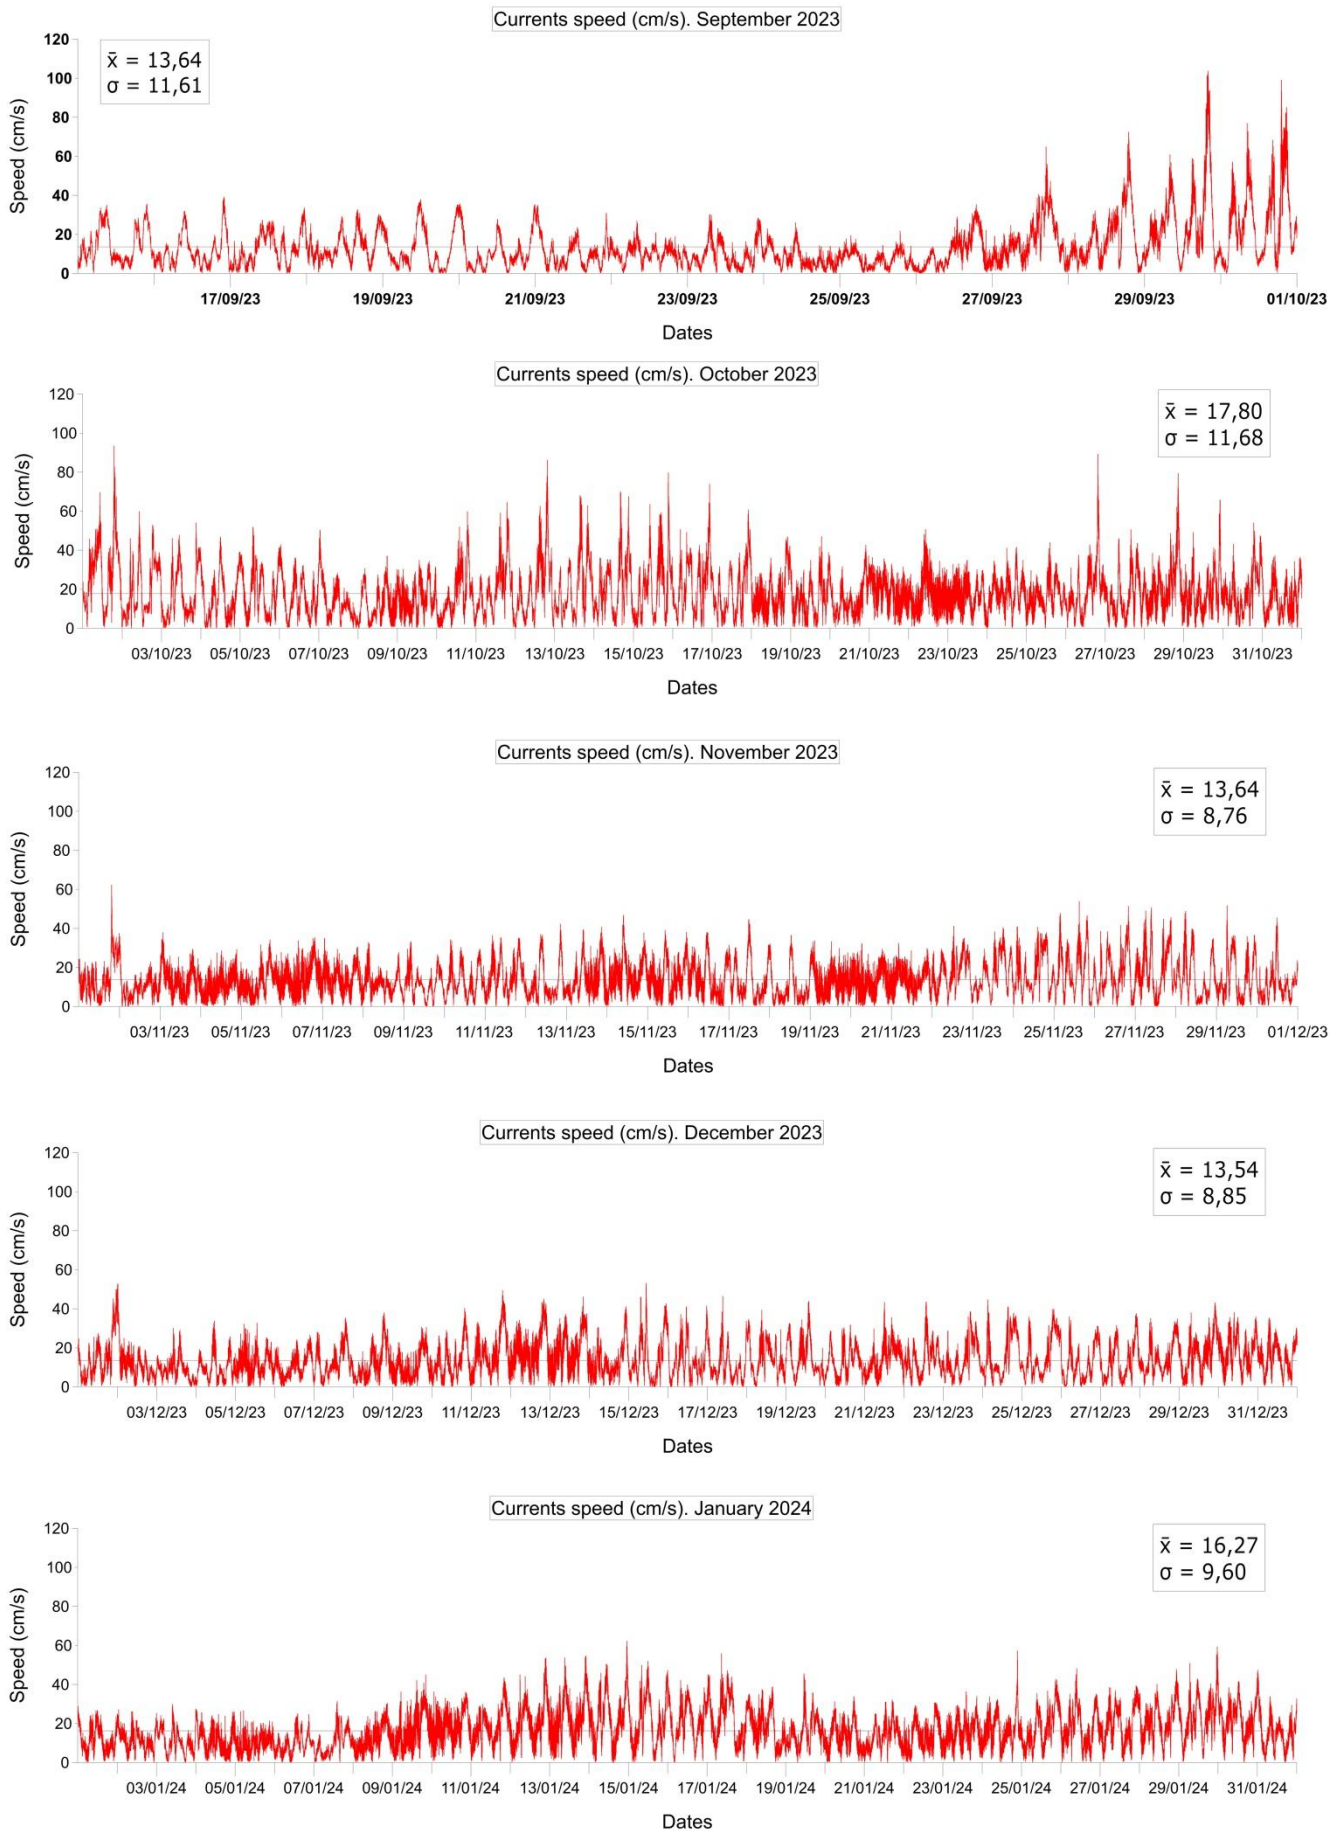

Figure S7a. Current speed measurements taken from 15 September 2023 to 31 August 2024. Each graph shows a monthly period, with a horizontal black line representing the monthly average value. Within the square, the average value and standard deviation are presented. Gaps in the line correspond to the data removed or missing due to maintenance in April 2024.

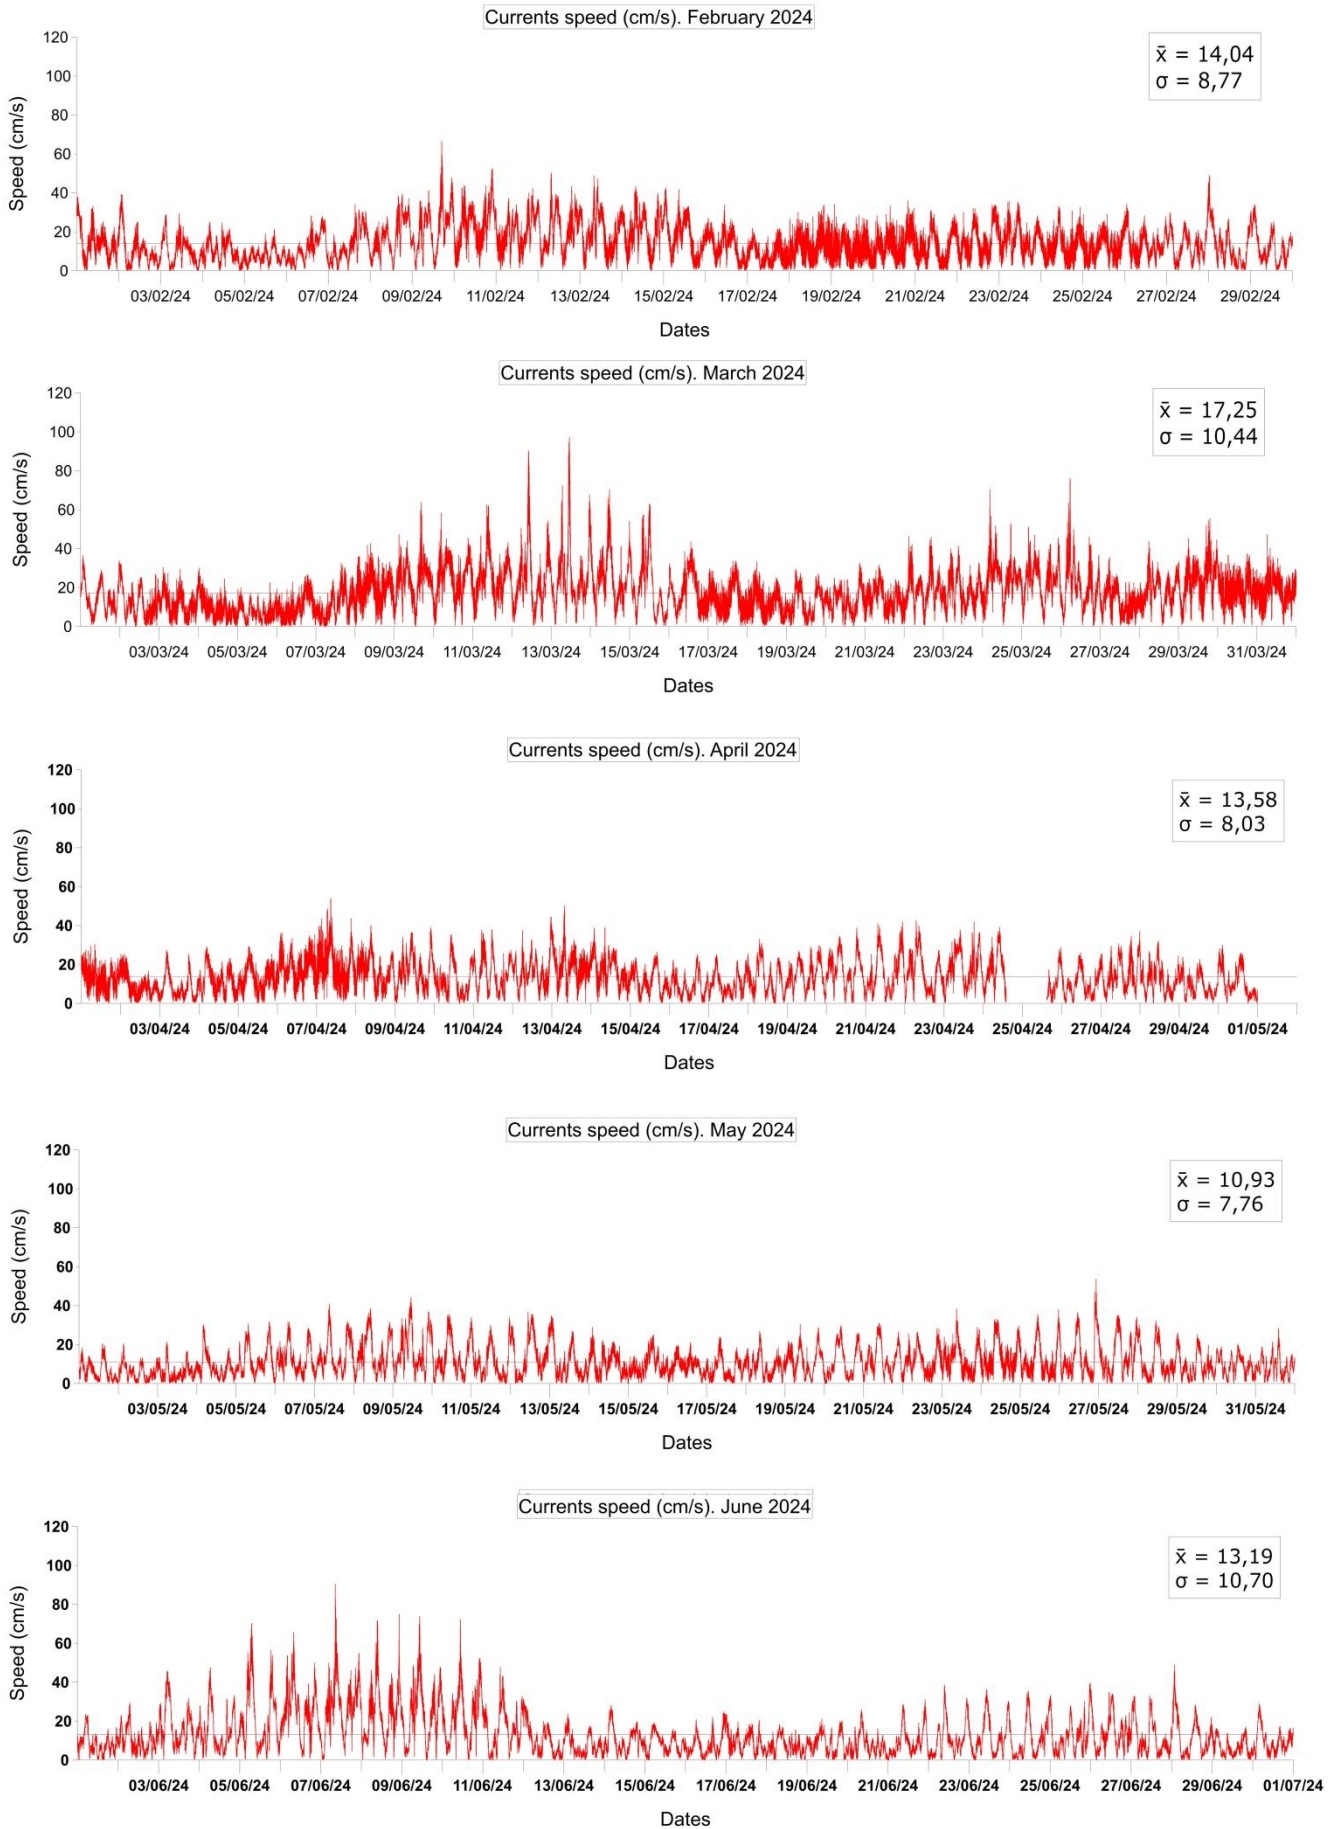

Figure S7b. Current speed measurements taken from 15 September 2023 to 31 August 2024. Each graph shows a monthly period, with a horizontal black line representing the monthly average value. Within the square, the average value and standard deviation are presented. Gaps in the line correspond to the data removed or missing due to maintenance in April 2024.

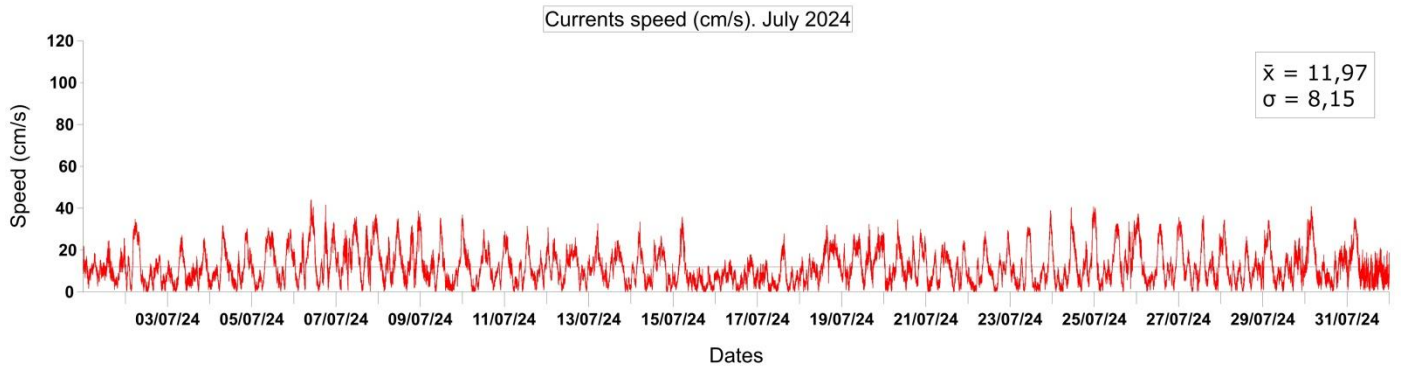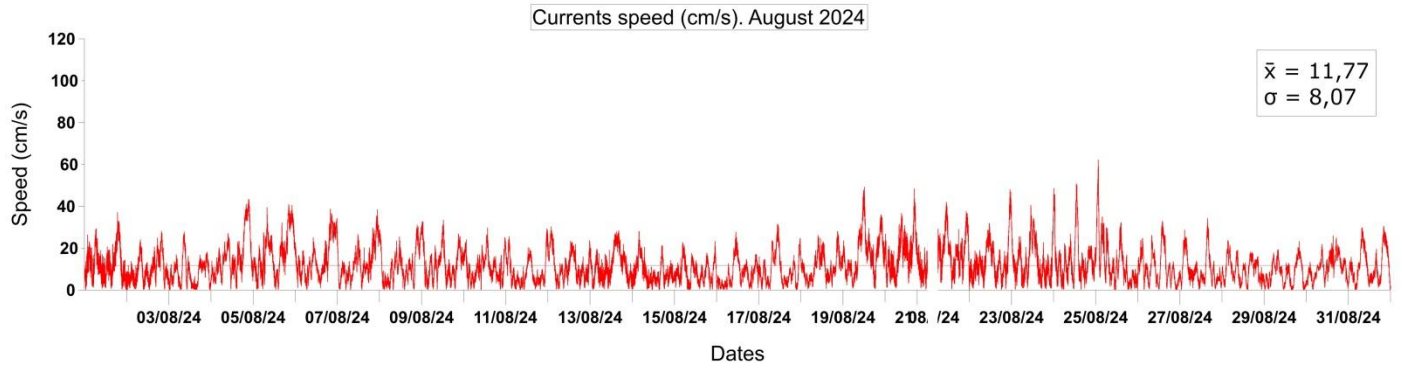

Figure S7c. Current speed measurements taken from 15 September 2023 to 31 August 2024. Each graph shows a monthly period, with a horizontal black line representing the monthly average value. Within the square, the average value and standard deviation are presented. Gaps in the line correspond to the data removed or missing due to maintenance in April 2024.

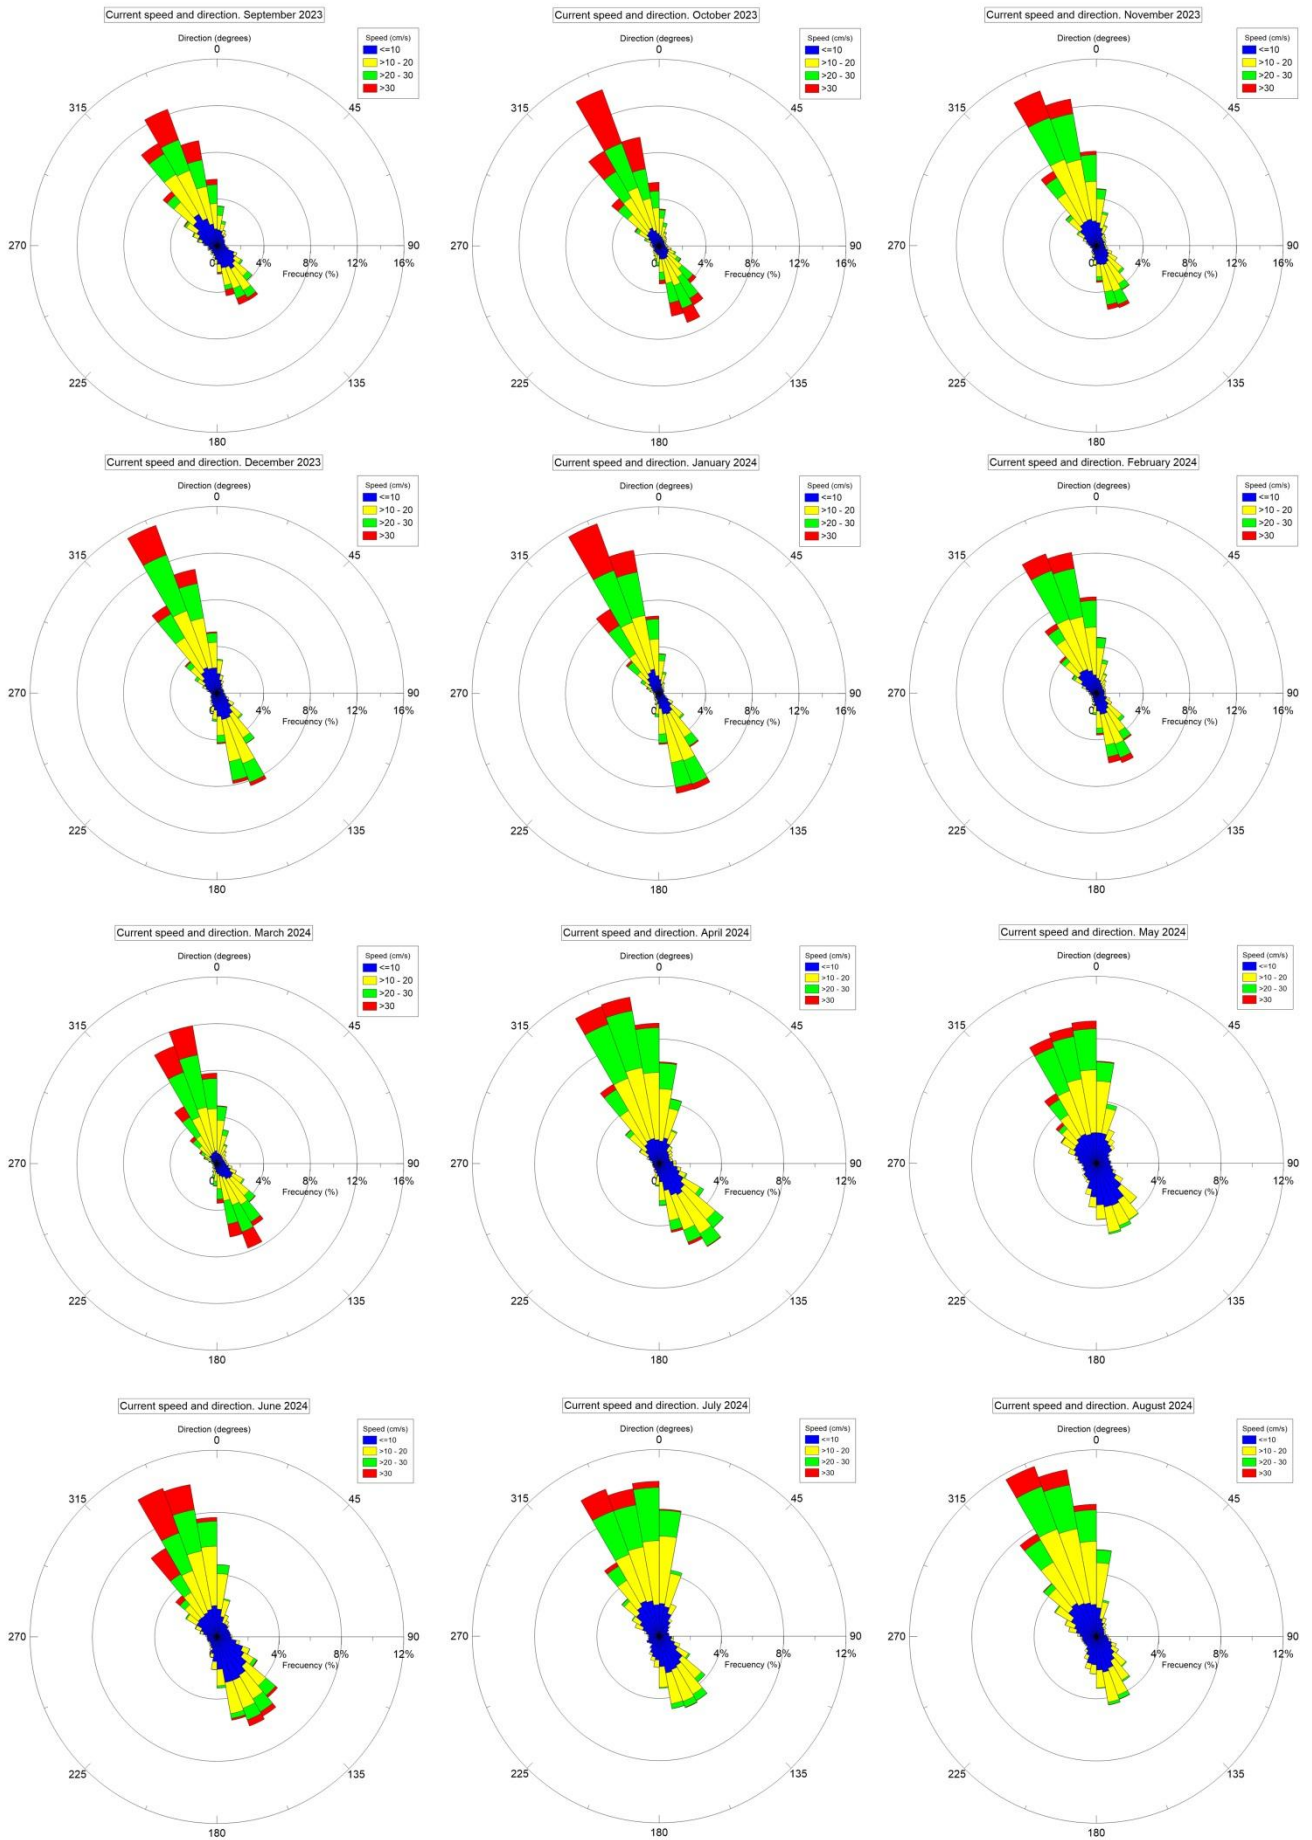

Figure S8. Current speed and direction measurements taken from 15 September 2023 to 31 August 2024. Each graph shows a monthly period.

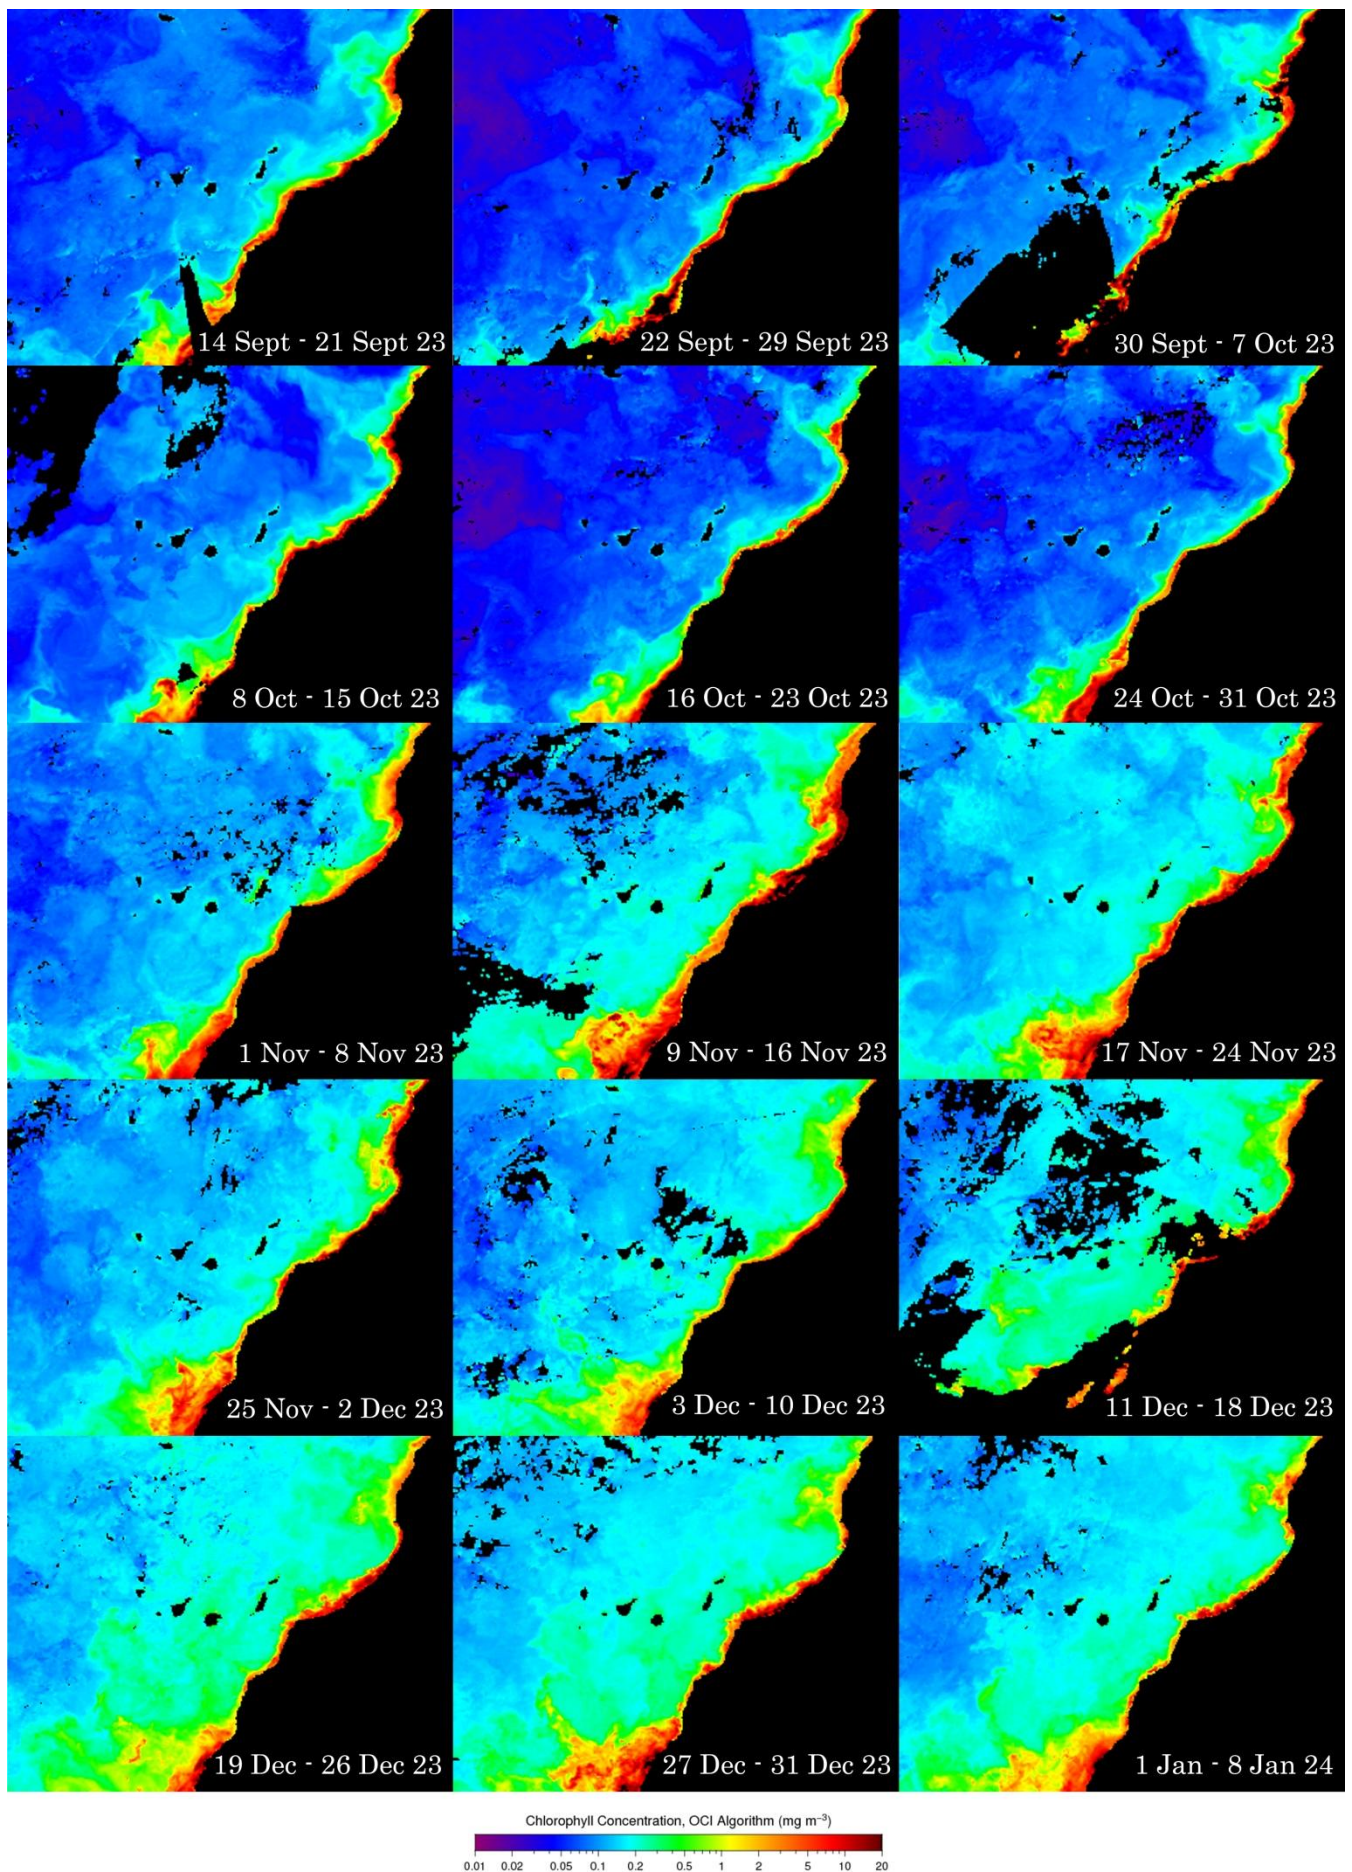

Figure S9a. Chlorophyll concentration ( $\text{mg m}^{-3}$ ) in the study area. Each NASA Aqua MODIS satellite image shows the 8-day average chlorophyll concentration from 15 September 2023 to 13 March 2025. The days covered by each image are shown.

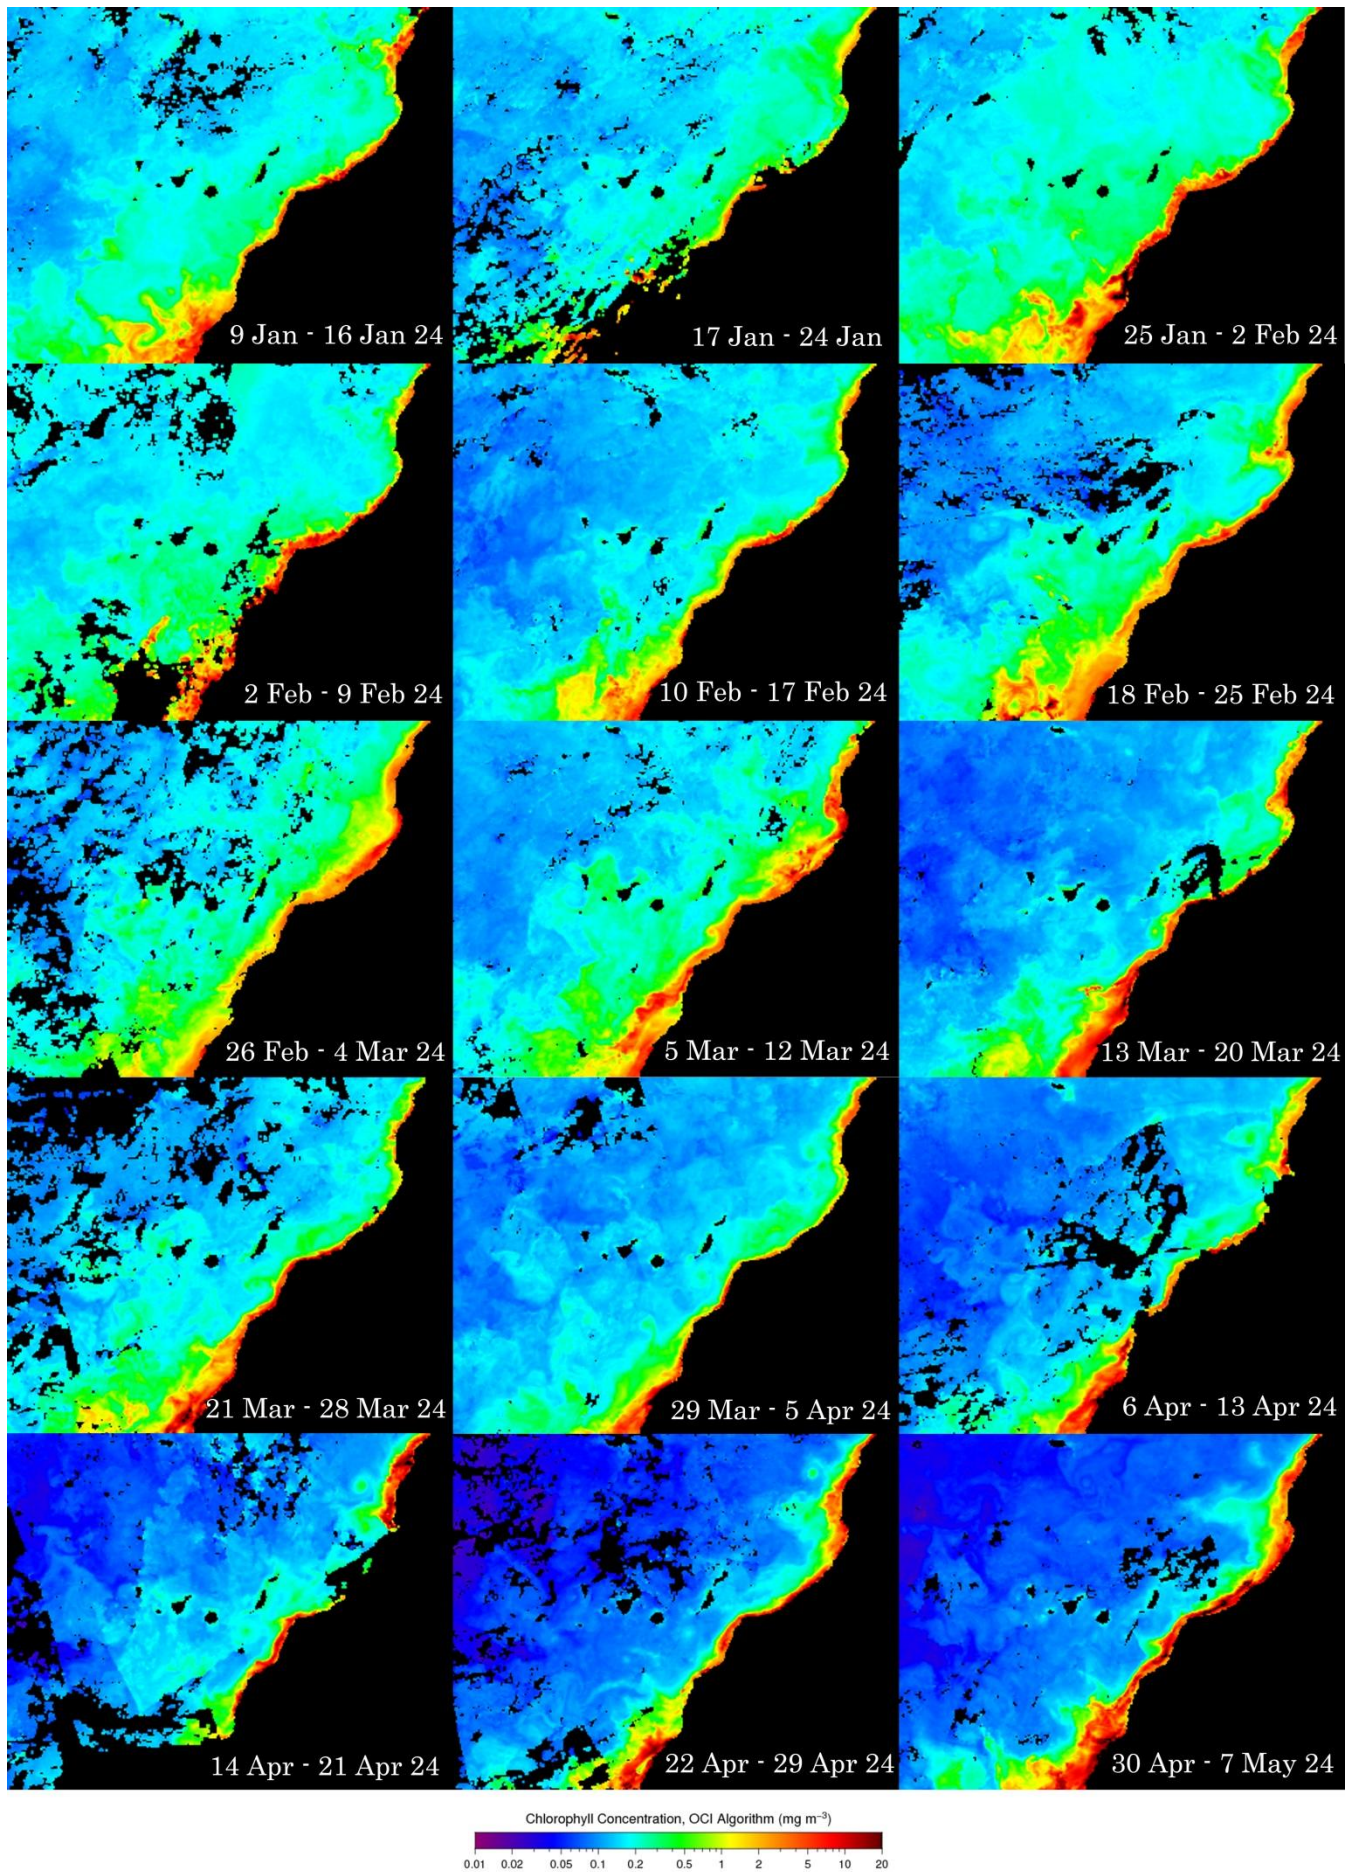

Figure S9b. Chlorophyll concentration ( $\text{mg m}^{-3}$ ) in the study area. Each NASA Aqua MODIS satellite image shows the 8-day average chlorophyll concentration from 15 September 2023 to 13 March 2025. The days covered by each image are shown.

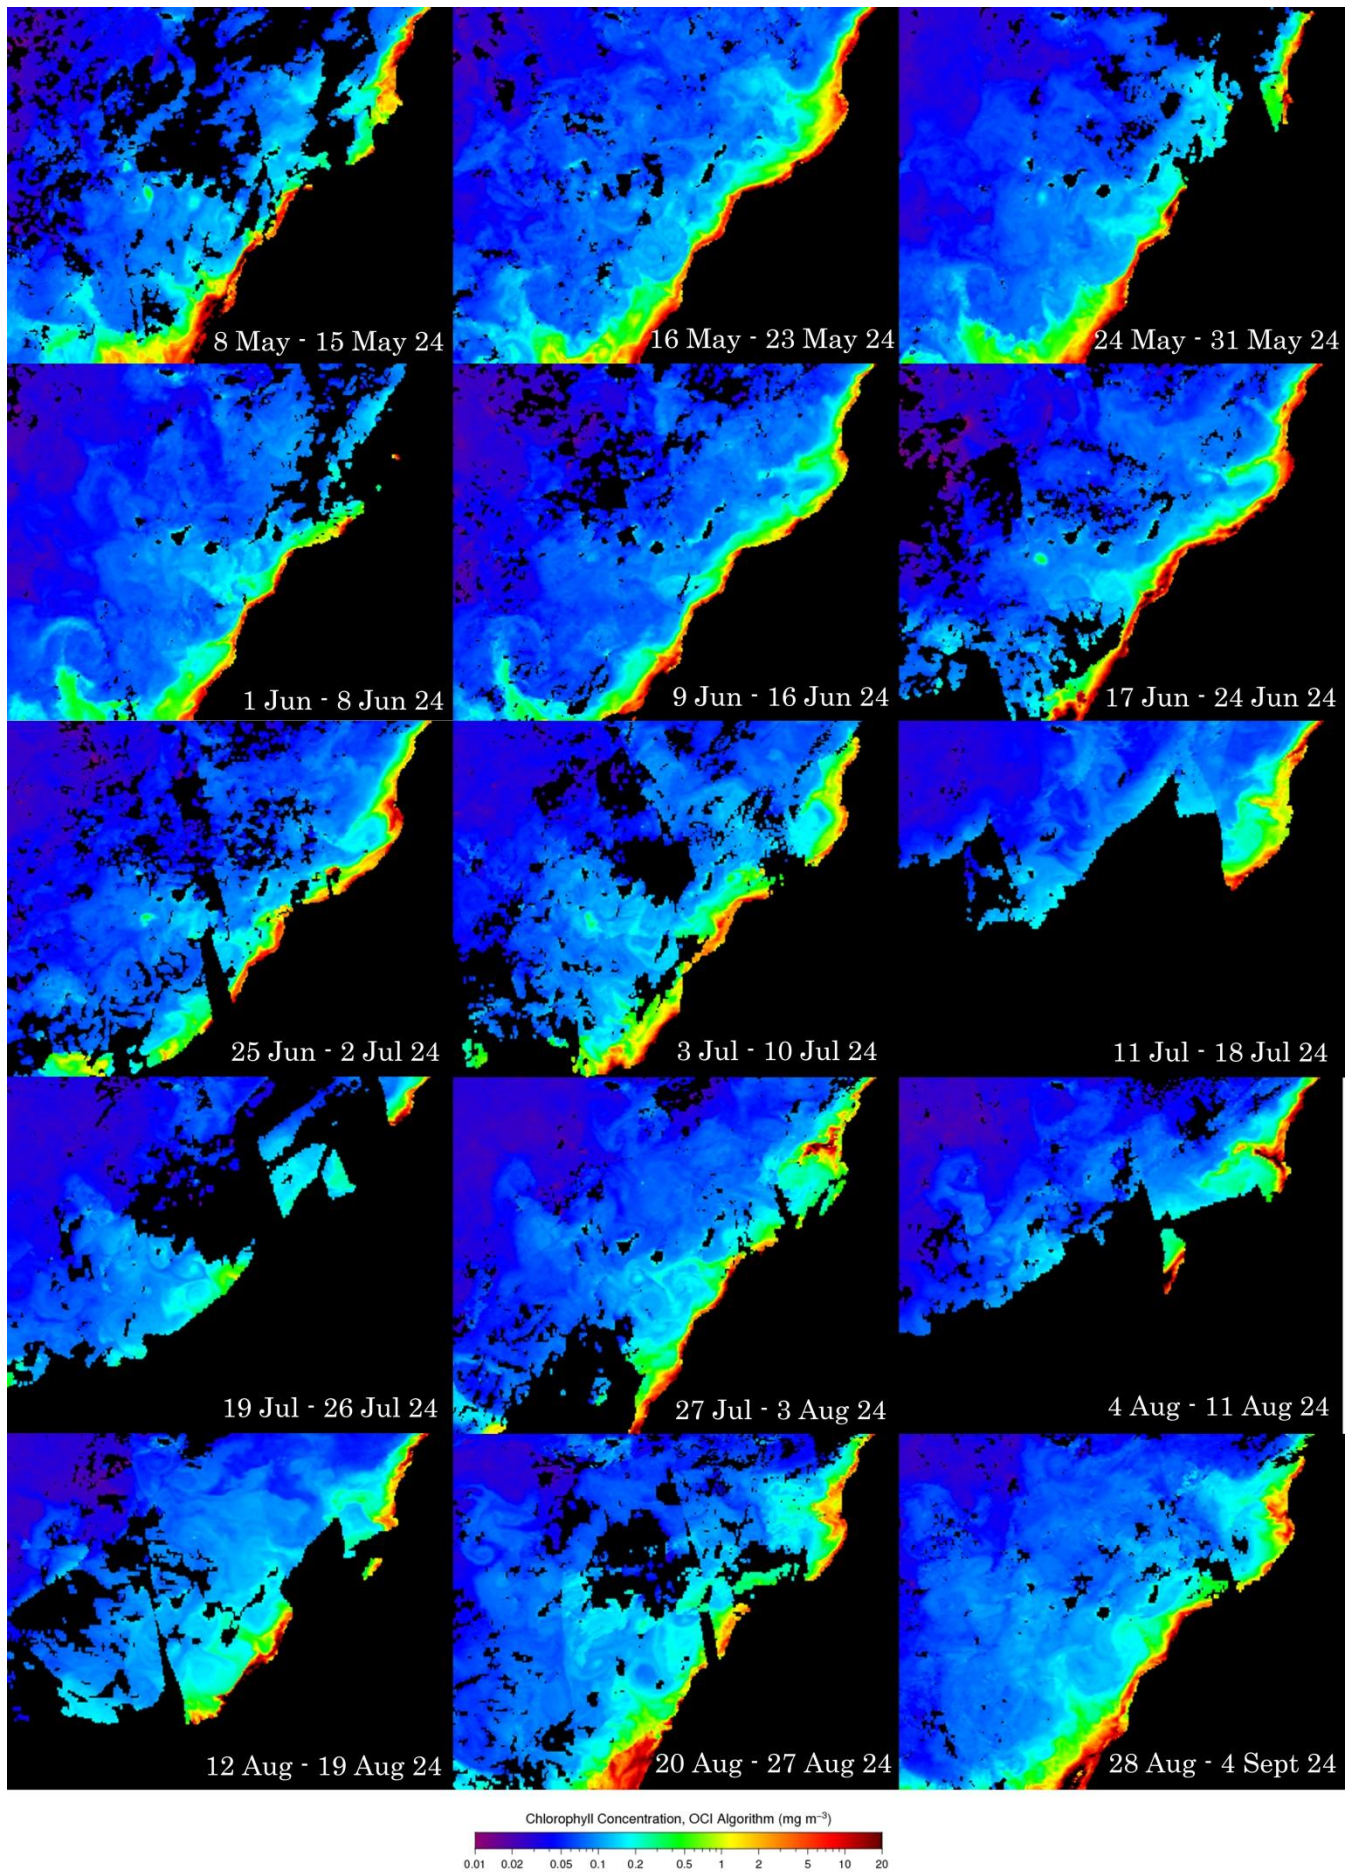

Figure S9c. Chlorophyll concentration ( $\text{mg m}^{-3}$ ) in the study area. Each NASA Aqua MODIS satellite image shows the 8-day average chlorophyll concentration from 15 September 2023 to 13 March 2025. The days covered by each image are shown.

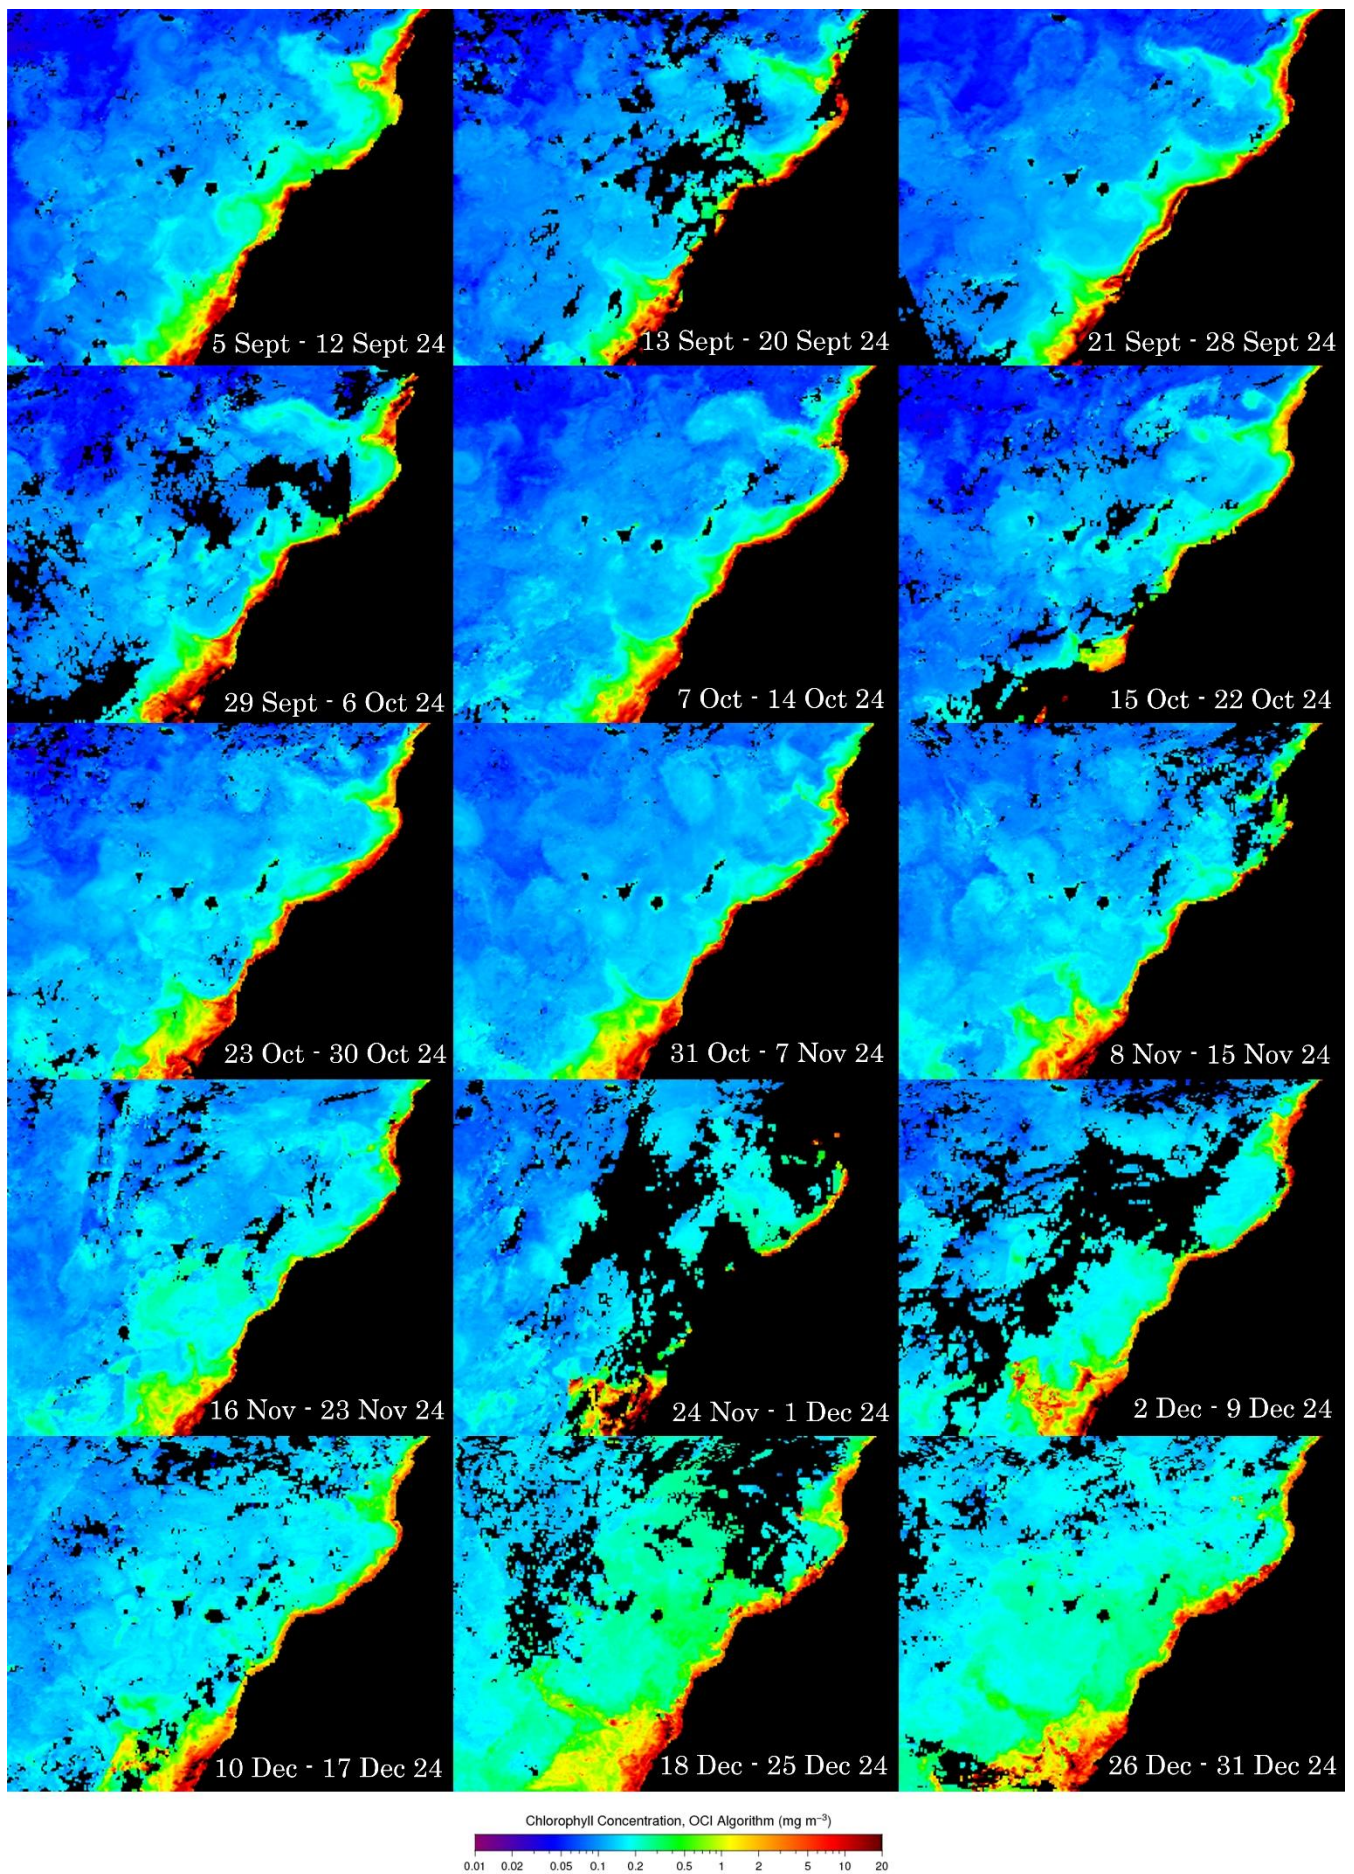

Figure S9d. Chlorophyll concentration ( $\text{mg m}^{-3}$ ) in the study area. Each NASA Aqua MODIS satellite image shows the 8-day average chlorophyll concentration from 15 September 2023 to 13 March 2025. The days covered by each image are shown.

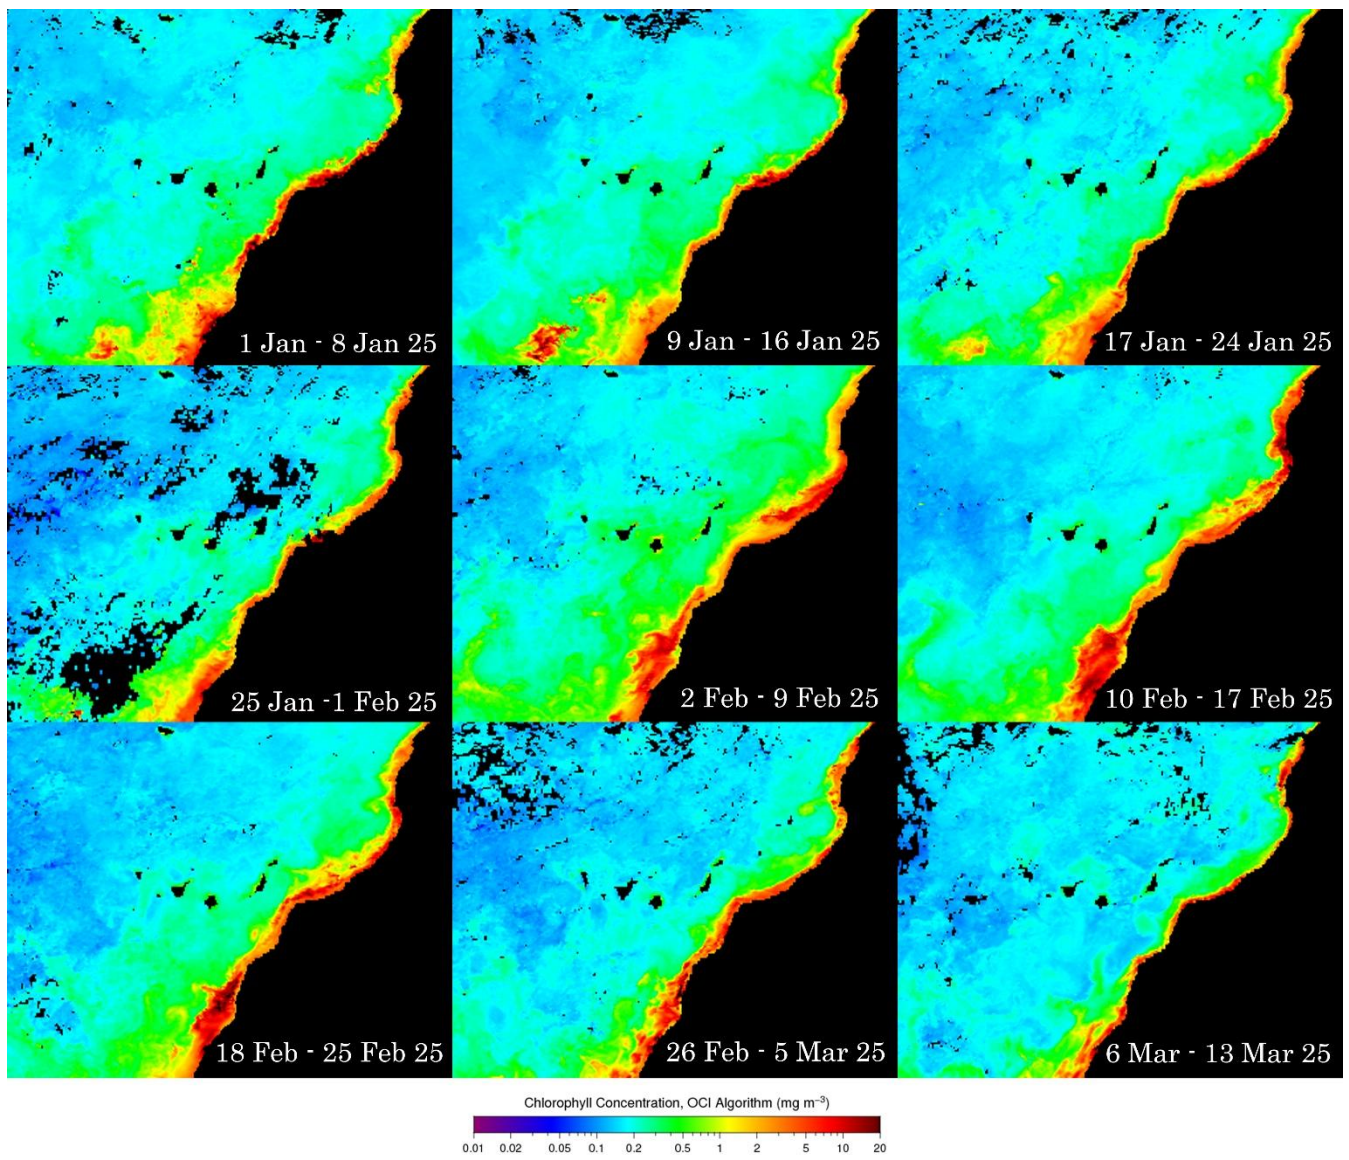

Figure S9e. Chlorophyll concentration ( $\text{mg m}^{-3}$ ) in the study area. Each NASA Aqua MODIS satellite image shows the 8-day average chlorophyll concentration from 15 September 2023 to 13 March 2025. The days covered by each image are shown.

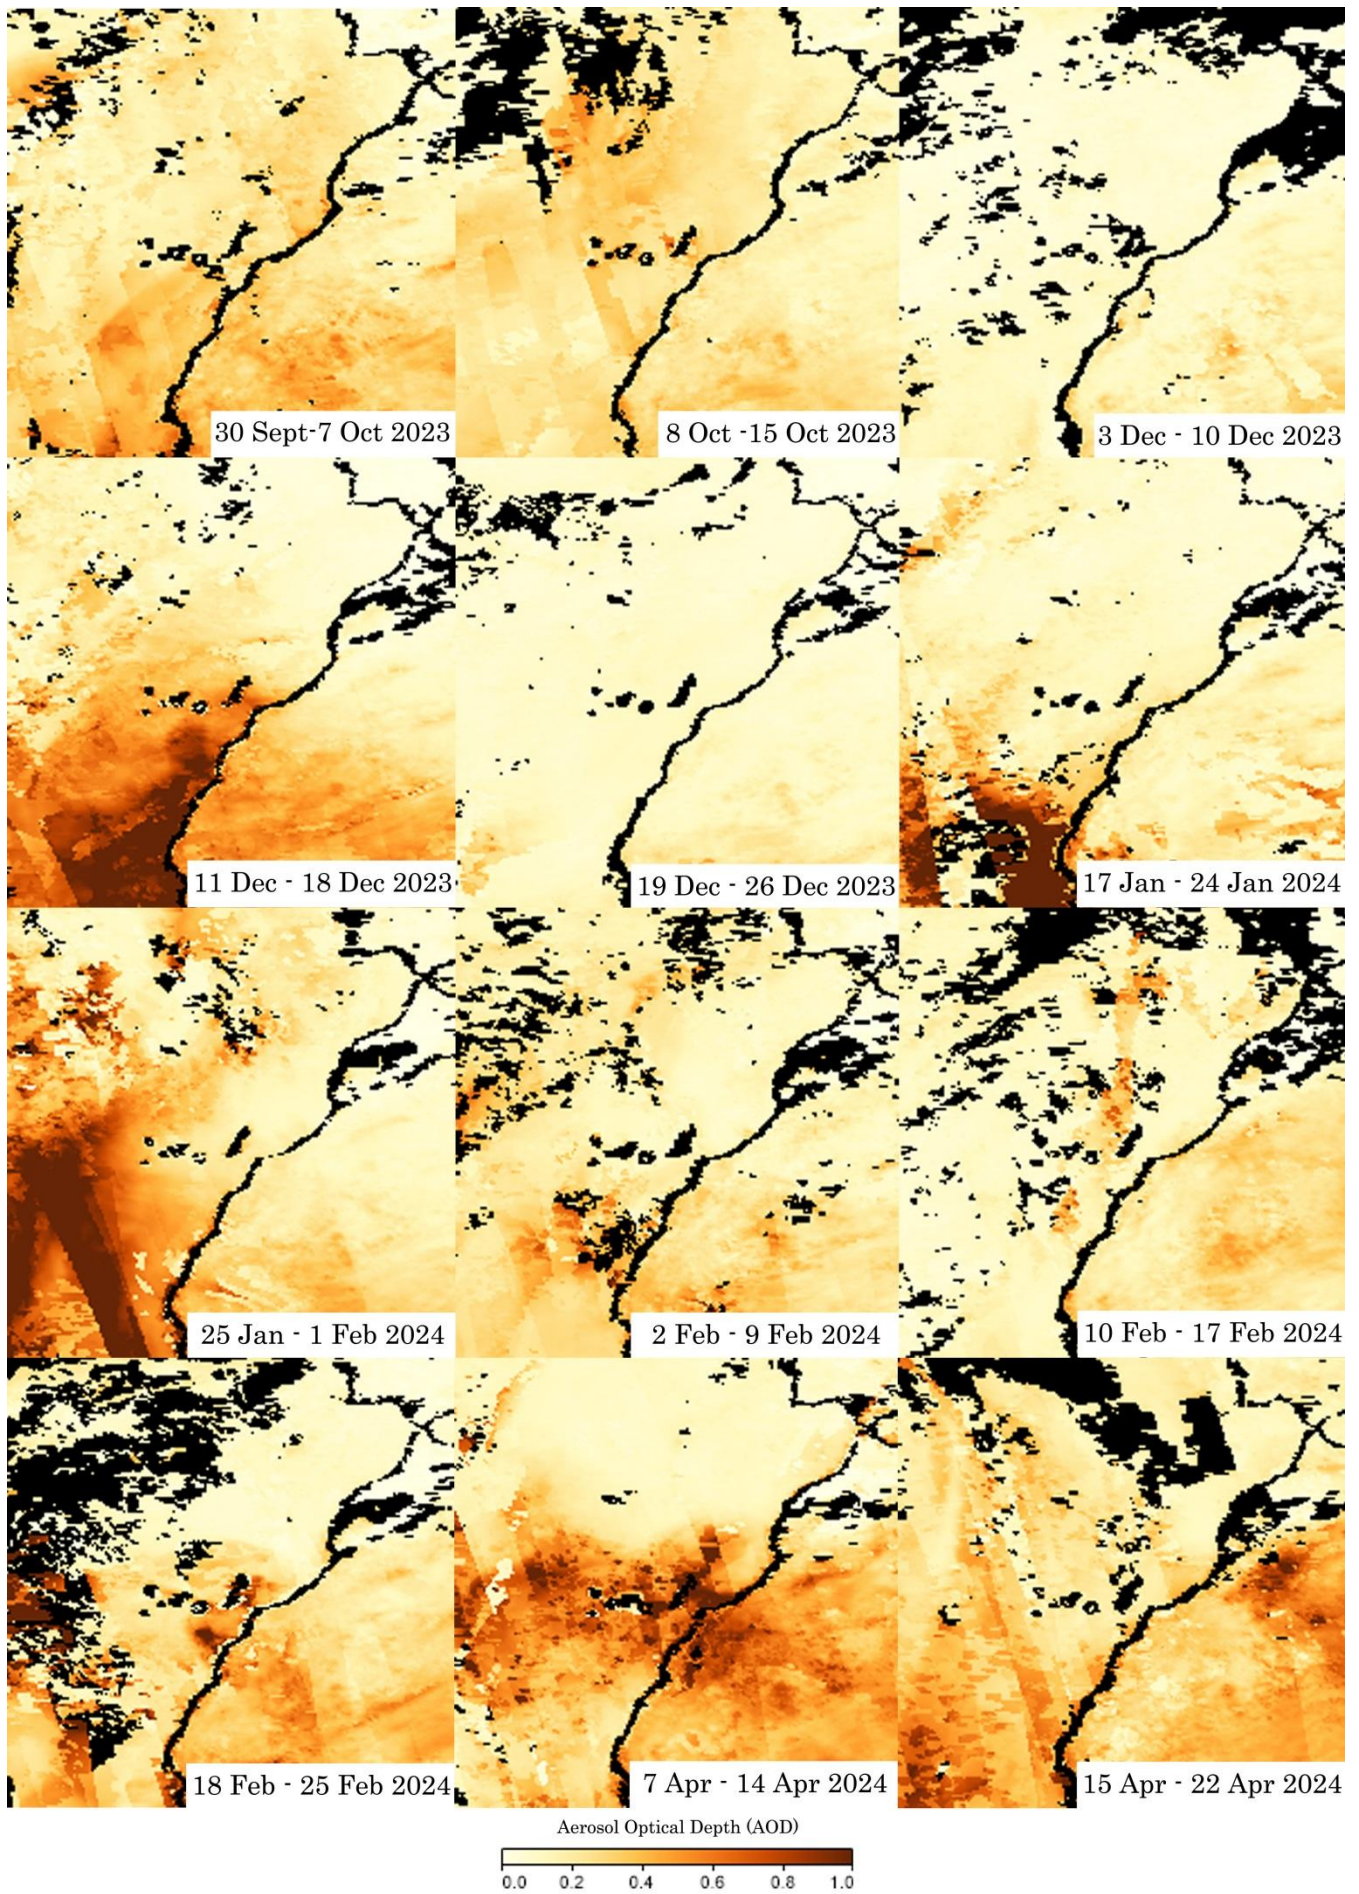

Figure S10a. Aerosol Optical Depth (AOD) in the study area. Each NASA Aqua MODIS satellite image shows the 8-day average AOD in selected episodes of calima from 15 September 2023 to 10 March 2025. The days covered by each image are shown.

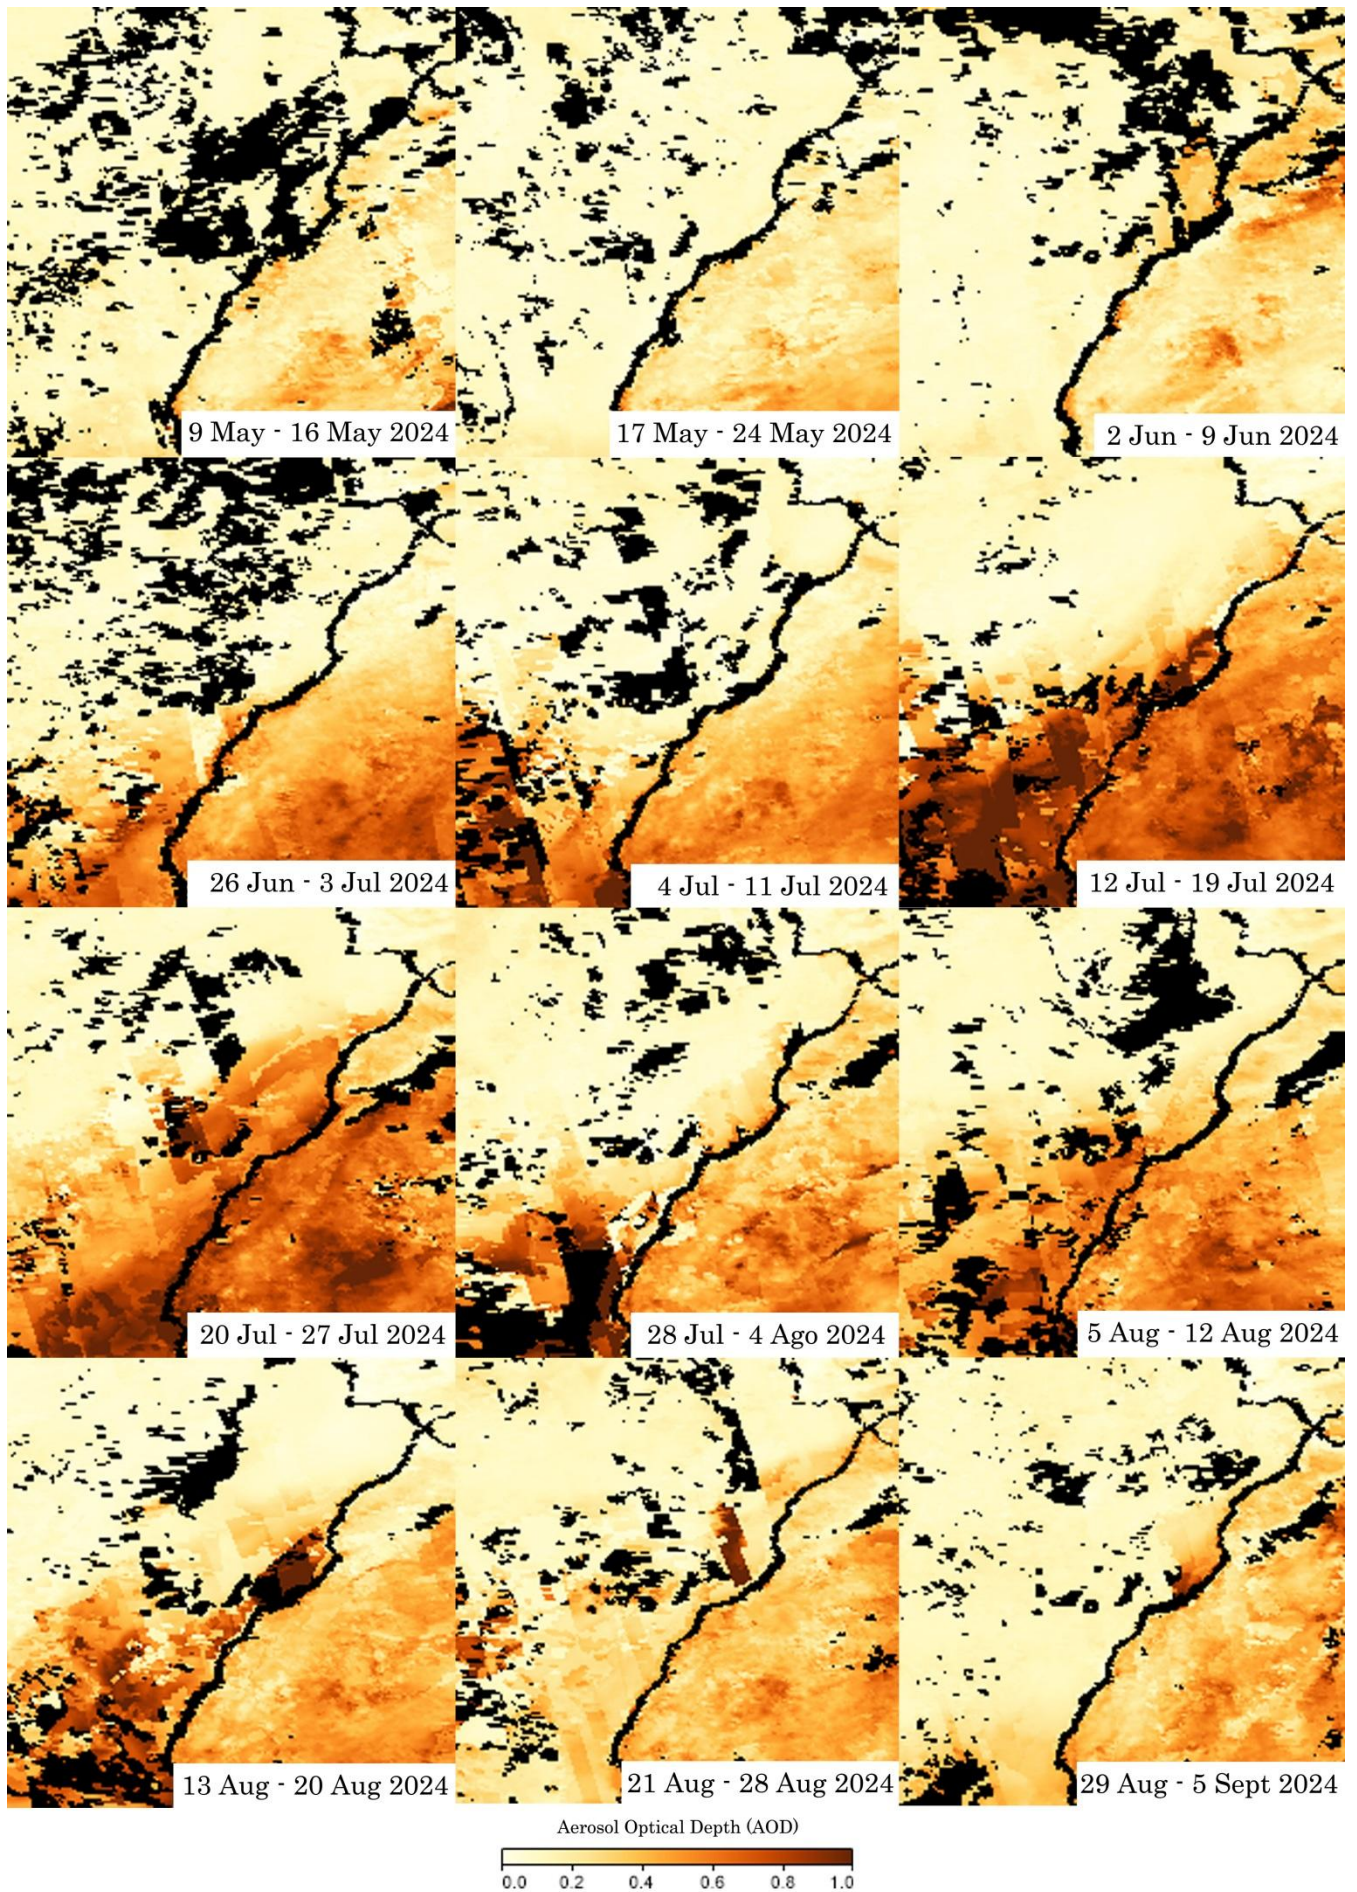

Figure S10b. Aerosol Optical Depth (AOD) in the study area. Each NASA Aqua MODIS satellite image shows the 8-day average AOD in selected episodes of calima from 15 September 2023 to 10 March 2025. The days covered by each image are shown.

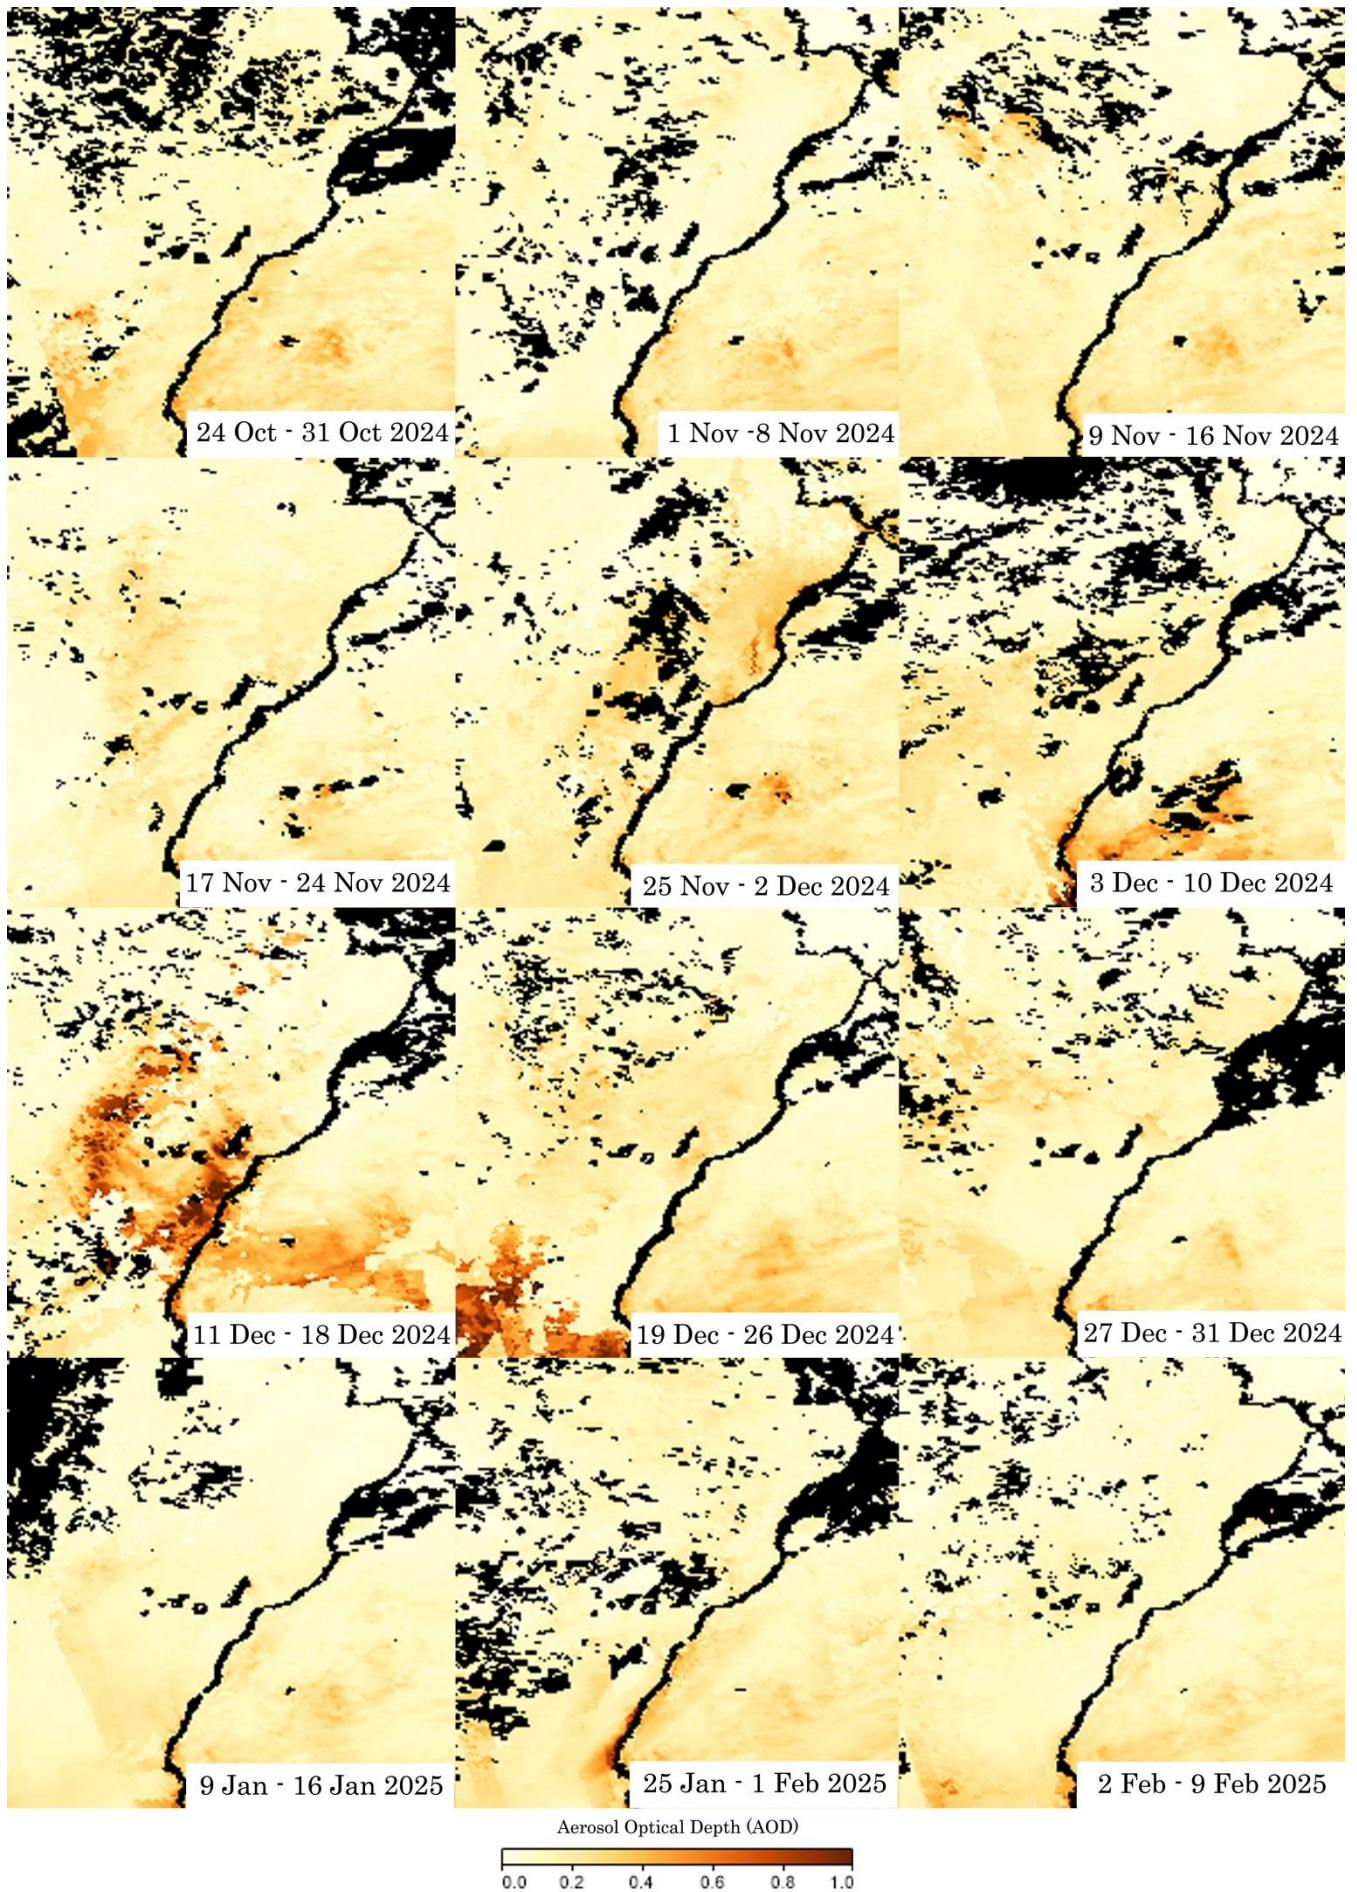

Figure S10c. Aerosol Optical Depth (AOD) in the study area. Each NASA Aqua MODIS satellite image shows the 8-day average AOD in selected episodes of calima from 15 September 2023 to 10 March 2025. The days covered by each image are shown.

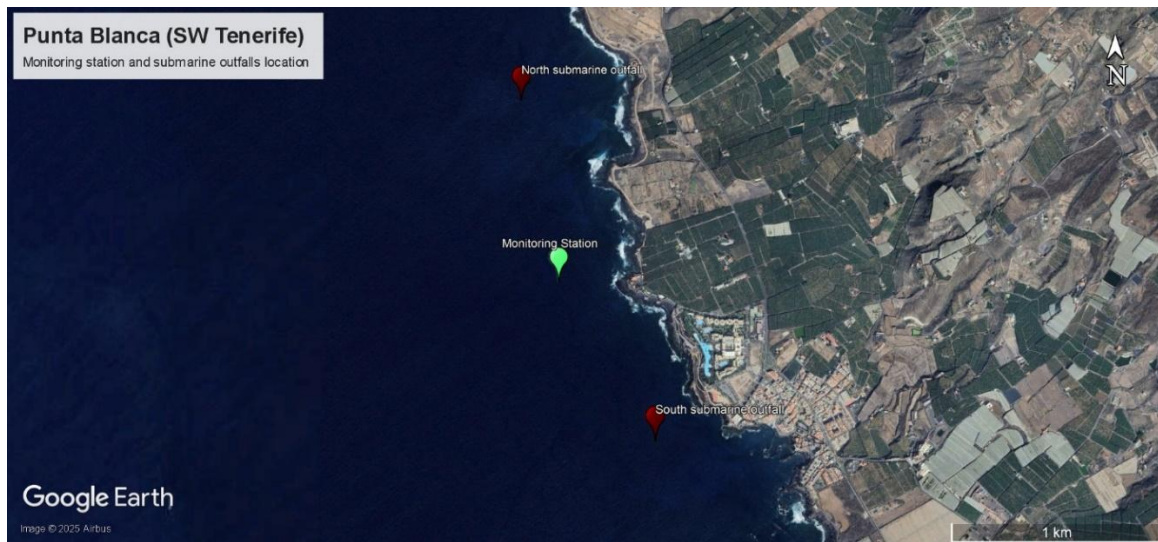

Figure S11. Red dot marks the location of the two submarine unauthorized outfalls and the green dot, the location of the monitoring station.

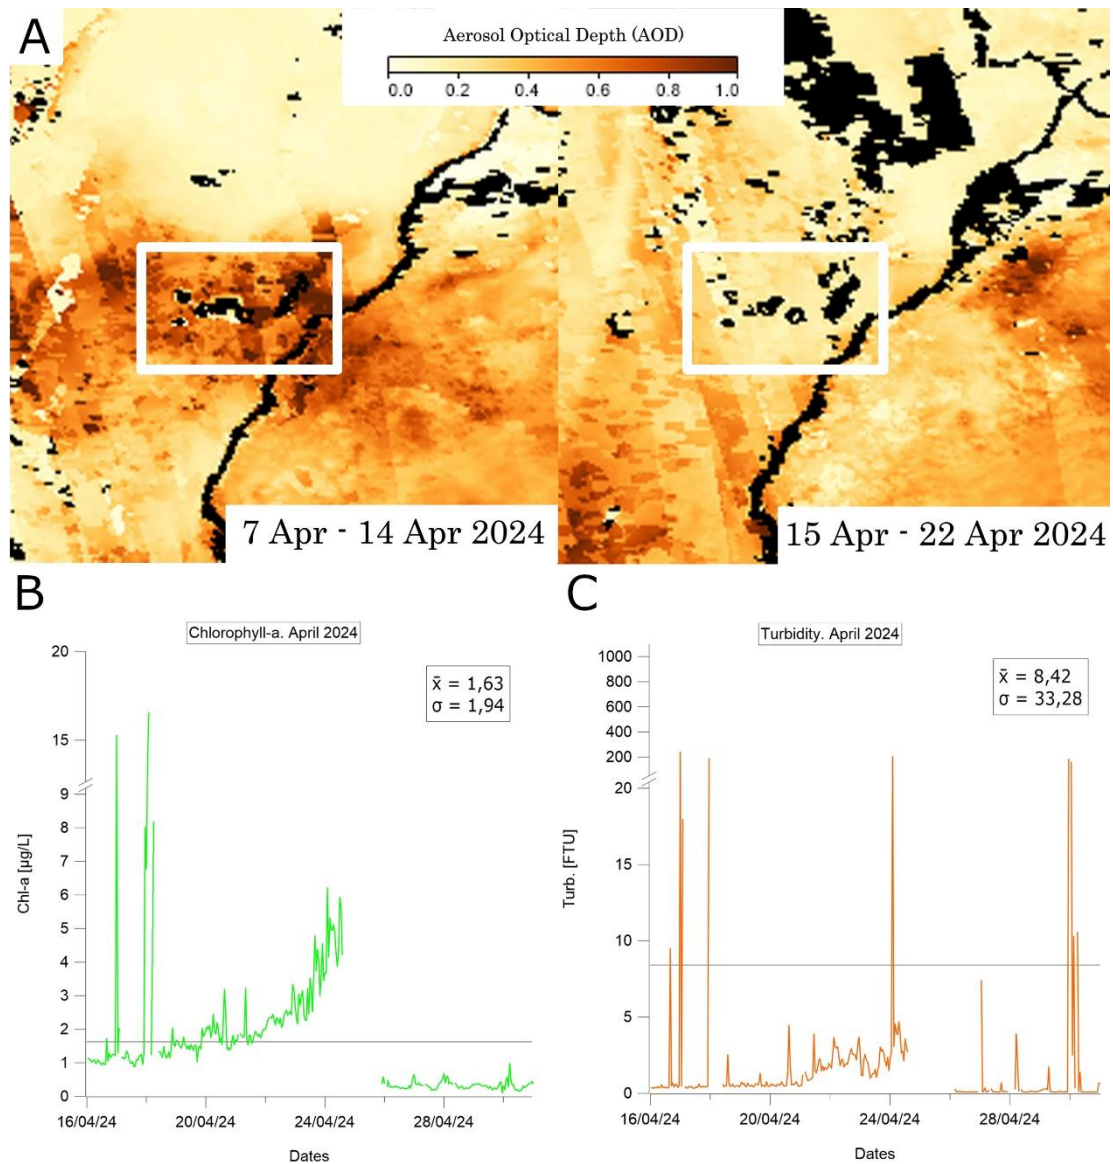

Figure S12. Comparative between AOD, chlorophyll-a concentration and turbidity measured by monitoring station in April 2024. (A) images of April's 2024 calima (B) chlorophyll-a and (C) turbidity, both corresponding to second 2-week of April 2024.

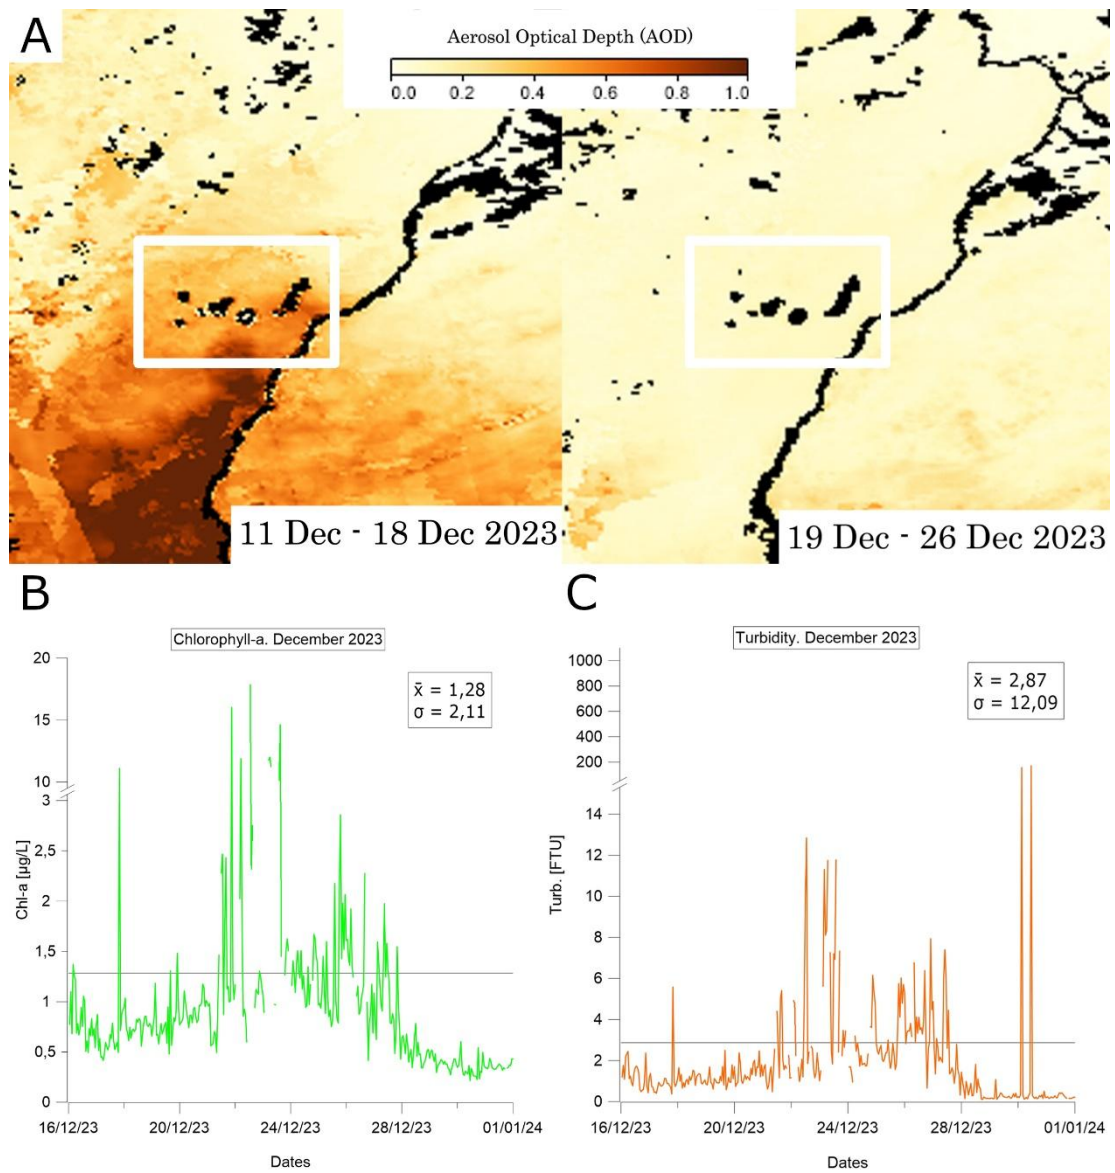

Figure S13. Comparative between AOD, chlorophyll-a concentration and turbidity measured by monitoring station in December 2023. (A) images of December's 2023 calima, (B) chlorophyll-a. and (C) turbidity, both corresponding to the second 2-week of December 2023.

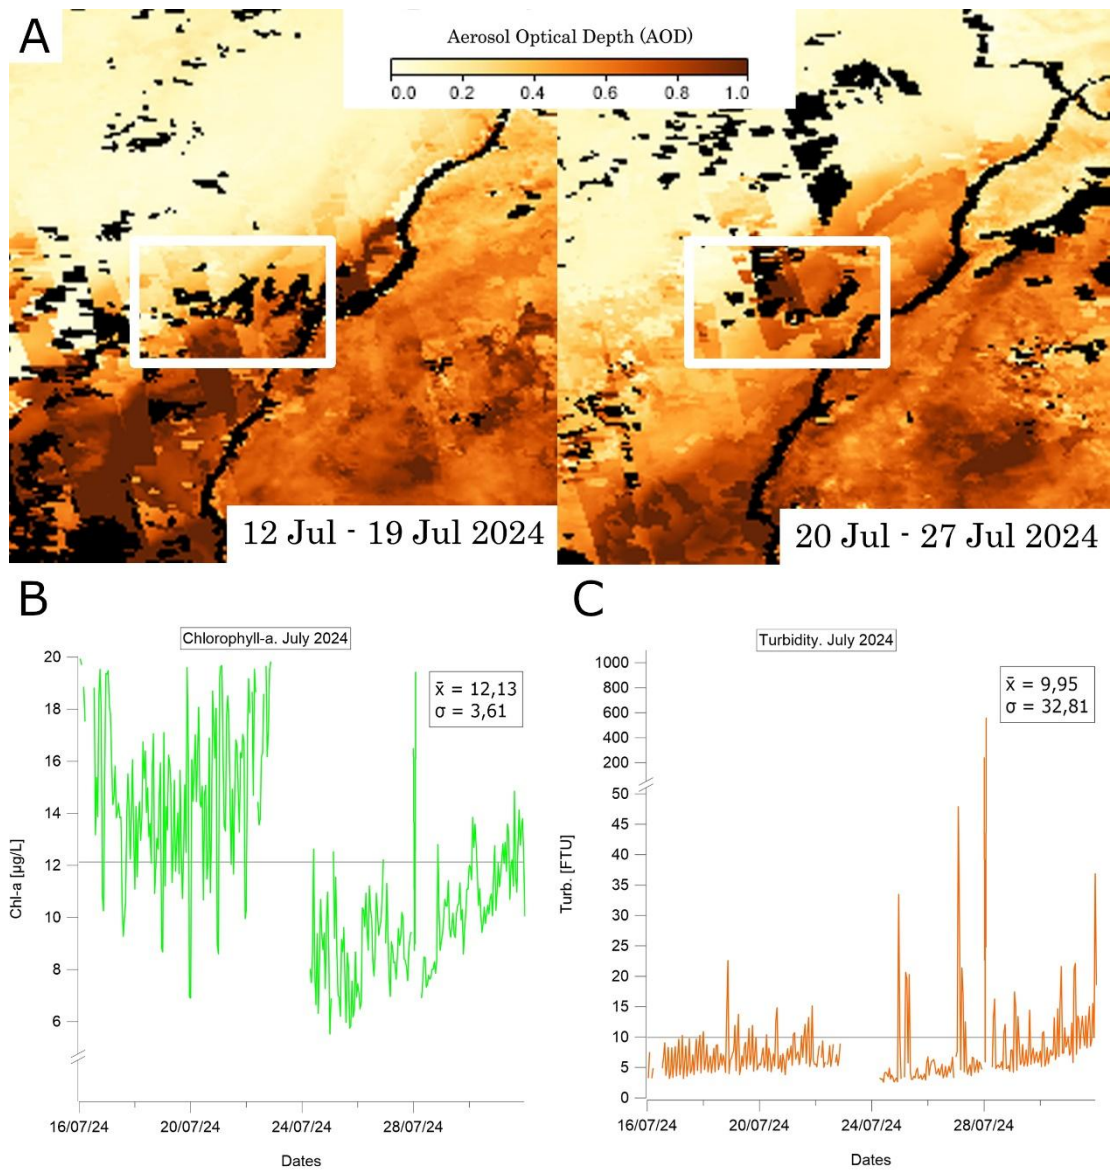

Figure S14. Comparative between AOD, chlorophyll-a concentration and turbidity measured by monitoring station in July 2024. (A) images of July's 2024 calima, (B) chlorophyll-a, and (C) turbidity, both corresponding to second 2-week of July 2024.

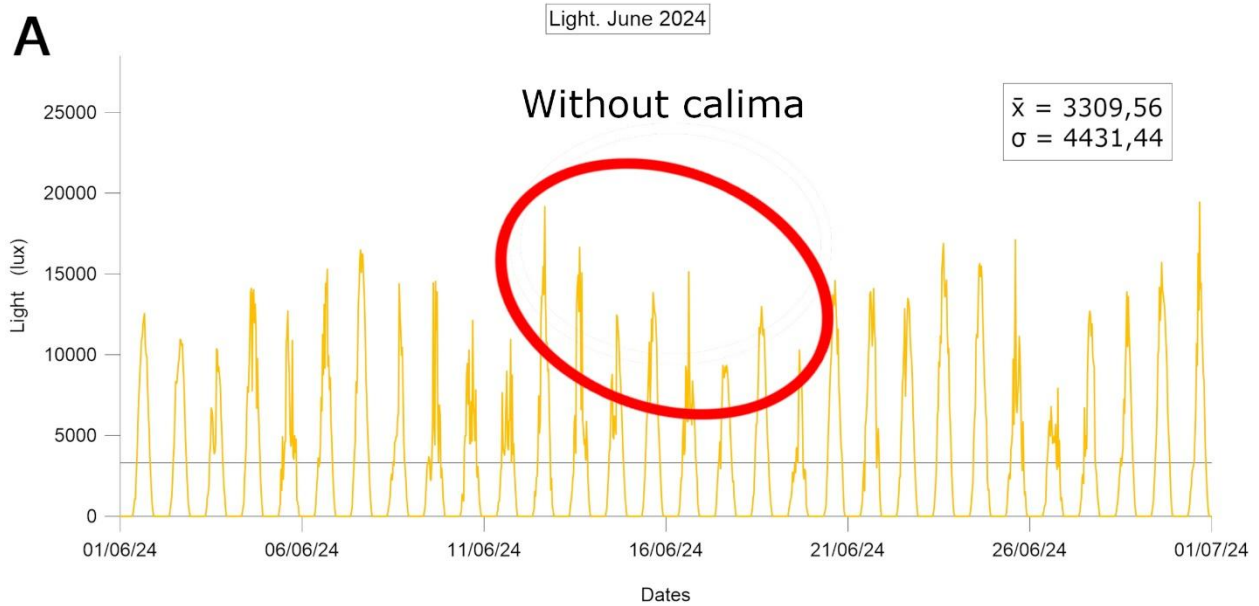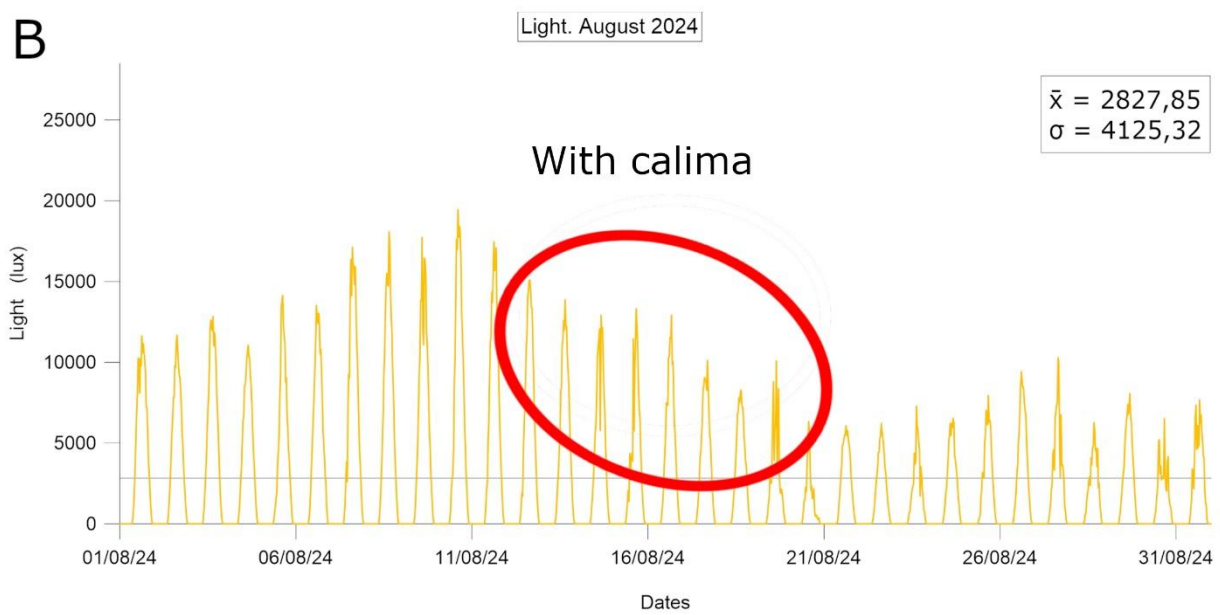

Figure S15. Light intensity recorded by the sensor between two periods without (A) /with calima (B). Light intensity recorded on compared week with calima, was about 19.68% lower than an 8-day period without calima.

|                     | Temperature (°C) |          |       |       | Salinity (PSU) |          |         |         | Light (lux) |          |          |      |
|---------------------|------------------|----------|-------|-------|----------------|----------|---------|---------|-------------|----------|----------|------|
|                     | $\bar{x}$        | $\sigma$ | Máx   | Mín   | $\bar{x}$      | $\sigma$ | Máx     | Mín     | $\bar{x}$   | $\sigma$ | Máx      | Mín  |
| <b>September 23</b> | 24.61            | 0.34     | 25.27 | 21.66 | No data        | No data  | No data | No data | 3158.95     | 4841.32  | 21381.12 | 0.00 |
| <b>October 23</b>   | 24.43            | 0.69     | 25.29 | 20.09 | No data        | No data  | No data | No data | 801.20      | 1342.02  | 7157.76  | 0.00 |
| <b>November 23</b>  | 23.97            | 0.59     | 25.02 | 20.59 | No data        | No data  | No data | No data | 520.66      | 897.52   | 5475.84  | 0.00 |
| <b>December 23</b>  | 22.60            | 0.42     | 23.44 | 20.93 | No data        | No data  | No data | No data | 326.07      | 561.70   | 3198.72  | 0.00 |
| <b>January 24</b>   | 21.46            | 0.39     | 22.03 | 19.50 | No data        | No data  | No data | No data | 621.47      | 1090.18  | 6497.28  | 0.00 |
| <b>February 24</b>  | 20.88            | 0.16     | 21.44 | 20.14 | No data        | No data  | No data | No data | 741.97      | 1115.27  | 5501.44  | 0.00 |
| <b>March 24</b>     | 20.27            | 0.24     | 20.93 | 19.35 | No data        | No data  | No data | No data | 443.12      | 706.77   | 4523.52  | 0.00 |
| <b>April 24</b>     | 20.55            | 0.40     | 21.83 | 19.74 | No data        | No data  | No data | No data | 1721.60     | 3622.05  | 28323.84 | 0.00 |
| <b>May 24</b>       | 21.20            | 0.31     | 22.26 | 20.15 | No data        | No data  | No data | No data | 3961.05     | 5508.54  | 27013.12 | 0.00 |
| <b>June 24</b>      | 21.76            | 0.33     | 22.51 | 20.50 | No data        | No data  | No data | No data | 3309.56     | 4431.44  | 19450.88 | 0.00 |
| <b>July 24</b>      | 22.18            | 0.37     | 23.31 | 21.00 | No data        | No data  | No data | No data | 4509.15     | 5909.16  | 23459.84 | 0.00 |
| <b>August 24</b>    | 23.26            | 0.33     | 24.09 | 22.29 | No data        | No data  | No data | No data | 2827.85     | 4125.32  | 19445.76 | 0.00 |
| <b>September 24</b> | 23.33            | 0.45     | 24.06 | 20.54 | 36.38          | 0.13     | 36.63   | 35.63   | 3051.79     | 4659.70  | 25548.80 | 0.00 |
| <b>October 24</b>   | 23.10            | 0.55     | 24.23 | 21.23 | 36.13          | 0.18     | 36.36   | 32.60   | 1073.65     | 1648.86  | 7815.68  | 0.00 |
| <b>November 24</b>  | 22.76            | 0.32     | 23.37 | 21.28 | 36.23          | 0.27     | 36.46   | 34.20   | 285.03      | 476.88   | 2837.76  | 0.00 |
| <b>December 24</b>  | 22.01            | 0.59     | 23.13 | 21.03 | 34.84          | 3.92     | 36.52   | 20.34   | 69.67       | 169.38   | 1884.16  | 0.00 |
| <b>January 25</b>   | 20.59            | 0.37     | 21.22 | 19.34 | 35.82          | 2.08     | 36.47   | 18.78   | 55.06       | 180.60   | 1534.08  | 0.00 |
| <b>February 25</b>  | 20.06            | 0.23     | 20.58 | 19.27 | 36.11          | 0.33     | 36.39   | 32.82   | 100.76      | 158.24   | 336.64   | 0.00 |
| <b>March 25</b>     | 19.77            | 0.27     | 20.41 | 19.00 | 36.25          | 0.07     | 36.38   | 35.85   | 96.59       | 179.09   | 1158.08  | 0.00 |

Table S1a. In this table monthly statistics (mean, standard deviation, maximum and minimum) from temperature, salinity, light intensity, currents speed, current direction and dissolved O<sub>2</sub> of the whole studied period are presented.

|                     | Current speed (cm/s) |          |         |         | Current direction (°) |          |         |         | Dissolved O <sub>2</sub> (mg/L) |          |         |         |
|---------------------|----------------------|----------|---------|---------|-----------------------|----------|---------|---------|---------------------------------|----------|---------|---------|
|                     | $\bar{x}$            | $\sigma$ | Máx     | Mín     | $\bar{x}$             | $\sigma$ | Máx     | Mín     | $\bar{x}$                       | $\sigma$ | Máx     | Mín     |
| <b>September 23</b> | 13.64                | 11.61    | 103.71  | 0.03    | 232.76                | 110.47   | 360.00  | 0.00    | 8.89                            | 0.09     | 9.27    | 8.53    |
| <b>October 23</b>   | 17.80                | 11.68    | 93.43   | 0.02    | 230.32                | 109.39   | 360.00  | 0.01    | 9.00                            | 0.13     | 9.57    | 8.70    |
| <b>November 23</b>  | 13.64                | 8.76     | 62.21   | 0.02    | 228.01                | 118.44   | 360.00  | 0.00    | No data                         | No data  | No data | No data |
| <b>December 23</b>  | 13.54                | 8.85     | 53.09   | 0.03    | 232.99                | 106.33   | 360.00  | 0.00    | No data                         | No data  | No data | No data |
| <b>January 24</b>   | 16.27                | 9.60     | 62.22   | 0.03    | 236.88                | 108.02   | 359.98  | 0.00    | No data                         | No data  | No data | No data |
| <b>February 24</b>  | 14.04                | 8.77     | 66.48   | 0.05    | 226.90                | 117.27   | 360.00  | 0.00    | No data                         | No data  | No data | No data |
| <b>March 24</b>     | 17.25                | 10.44    | 97.09   | 0.08    | 214.14                | 116.71   | 360.00  | 0.00    | No data                         | No data  | No data | No data |
| <b>April 24</b>     | 13.58                | 8.03     | 53.82   | 0.01    | 207.13                | 123.11   | 359.99  | 0.01    | 9.58                            | 0.09     | 9.96    | 9.36    |
| <b>May 24</b>       | 10.93                | 7.76     | 53.67   | 0.02    | 209.82                | 120.12   | 360.00  | 0.00    | 9.62                            | 0.10     | 9.93    | 9.39    |
| <b>June 24</b>      | 13.19                | 10.70    | 90.39   | 0.04    | 215.63                | 114.48   | 360.00  | 0.00    | No data                         | No data  | No data | No data |
| <b>July 24</b>      | 11.97                | 8.15     | 44.01   | 0.02    | 210.72                | 123.32   | 360.00  | 0.00    | No data                         | No data  | No data | No data |
| <b>August 24</b>    | 11.77                | 8.07     | 62.18   | 0.02    | 233.13                | 114.13   | 360.00  | 0.00    | No data                         | No data  | No data | No data |
| <b>September 24</b> | No data              | No data  | No data | No data | No data               | No data  | No data | No data | 9.19                            | 0.09     | 9.50    | 8.90    |
| <b>October 24</b>   | No data              | No data  | No data | No data | No data               | No data  | No data | No data | 9.25                            | 0.22     | 10.55   | 8.60    |
| <b>November 24</b>  | No data              | No data  | No data | No data | No data               | No data  | No data | No data | 9.27                            | 0.46     | 11.32   | 4.04    |
| <b>December 24</b>  | No data              | No data  | No data | No data | No data               | No data  | No data | No data | 9.47                            | 0.84     | 14.51   | 8.44    |
| <b>January 25</b>   | No data              | No data  | No data | No data | No data               | No data  | No data | No data | 9.80                            | 0.90     | 13.77   | 8.73    |
| <b>February 25</b>  | No data              | No data  | No data | No data | No data               | No data  | No data | No data | 9.93                            | 1.09     | 15.03   | 8.09    |
| <b>March 25</b>     | No data              | No data  | No data | No data | No data               | No data  | No data | No data | 9.93                            | 1.32     | 14.59   | 8.40    |

Table S1b. In this table monthly statistics (mean, standard deviation, maximum and minimum) from temperature, salinity, light intensity, currents speed, current direction and dissolved O<sub>2</sub> of the whole studied period are presented.

|                     | Chlorophyll-a (ug/L) |             |              |             | Turbidity (FTU) |              |                |             |
|---------------------|----------------------|-------------|--------------|-------------|-----------------|--------------|----------------|-------------|
|                     | $\bar{x}$            | $\sigma$    | Máx          | Mín         | $\bar{x}$       | $\sigma$     | Máx            | Mín         |
| <b>September 23</b> | <b>0.38</b>          | <b>1.12</b> | <b>19.68</b> | <b>0.12</b> | <b>0.17</b>     | <b>0.76</b>  | <b>13.30</b>   | <b>0.07</b> |
| 2nd 2-week          | 0.38                 | 1.12        | 19.68        | 0.12        | 0.17            | 0.76         | 13.30          | 0.07        |
| <b>October 23</b>   | <b>0.54</b>          | <b>1.13</b> | <b>16.85</b> | <b>0.20</b> | <b>0.39</b>     | <b>0.62</b>  | <b>7.72</b>    | <b>0.07</b> |
| 1st 2-week          | 0.61                 | 1.62        | 16.85        | 0.20        | 0.26            | 0.75         | 7.72           | 0.07        |
| 2nd 2-week          | 0.49                 | 0.18        | 1.23         | 0.21        | 0.52            | 0.44         | 3.25           | 0.08        |
| <b>November 23</b>  | <b>1.33</b>          | <b>1.94</b> | <b>19.02</b> | <b>0.23</b> | <b>2.29</b>     | <b>2.90</b>  | <b>30.33</b>   | <b>0.38</b> |
| 1st 2-week          | 1.57                 | 2.49        | 19.02        | 0.25        | 2.37            | 3.26         | 30.33          | 0.45        |
| 2nd 2-week          | 1.10                 | 1.13        | 7.17         | 0.23        | 2.22            | 2.50         | 15.65          | 0.38        |
| <b>December 23</b>  | <b>1.57</b>          | <b>1.82</b> | <b>17.86</b> | <b>0.22</b> | <b>3.65</b>     | <b>8.95</b>  | <b>169.94</b>  | <b>0.11</b> |
| 1st 2-week          | 1.86                 | 1.40        | 16.78        | 0.40        | 4.46            | 3.19         | 15.03          | 0.11        |
| 2nd 2-week          | 1.28                 | 2.11        | 17.86        | 0.22        | 2.87            | 12.09        | 169.94         | 0.11        |
| <b>January 24</b>   | <b>0.93</b>          | <b>0.64</b> | <b>7.00</b>  | <b>0.25</b> | <b>1.25</b>     | <b>2.94</b>  | <b>75.50</b>   | <b>0.15</b> |
| 1st 2-week          | 0.75                 | 0.33        | 3.64         | 0.25        | 1.14            | 4.01         | 75.50          | 0.15        |
| 2nd 2-week          | 1.10                 | 0.80        | 7.00         | 0.40        | 1.35            | 1.29         | 8.95           | 0.20        |
| <b>February 24</b>  | <b>0.64</b>          | <b>0.46</b> | <b>10.49</b> | <b>0.29</b> | <b>0.50</b>     | <b>1.26</b>  | <b>22.35</b>   | <b>0.12</b> |
| 1st 2-week          | 0.71                 | 0.22        | 2.43         | 0.31        | 0.61            | 1.48         | 22.35          | 0.12        |
| 2nd 2-week          | 0.57                 | 0.62        | 10.49        | 0.29        | 0.39            | 0.96         | 14.81          | 0.14        |
| <b>March 24</b>     | <b>1.09</b>          | <b>1.42</b> | <b>17.07</b> | <b>0.32</b> | <b>5.09</b>     | <b>21.38</b> | <b>281.48</b>  | <b>0.13</b> |
| 1st 2-week          | 1.05                 | 0.95        | 14.26        | 0.44        | 2.29            | 14.05        | 163.58         | 0.13        |
| 2nd 2-week          | 1.13                 | 1.75        | 17.07        | 0.32        | 7.72            | 26.22        | 281.48         | 0.16        |
| <b>April 24</b>     | <b>1.63</b>          | <b>2.64</b> | <b>19.83</b> | <b>0.10</b> | <b>15.12</b>    | <b>52.81</b> | <b>477.01</b>  | <b>0.08</b> |
| 1st 2-week          | 1.64                 | 3.16        | 19.83        | 0.23        | 21.54           | 65.75        | 477.01         | 0.15        |
| 2nd 2-week          | 1.63                 | 1.94        | 16.56        | 0.10        | 8.42            | 33.28        | 315.51         | 0.08        |
| <b>May 24</b>       | <b>0.41</b>          | <b>0.26</b> | <b>4.12</b>  | <b>0.01</b> | <b>11.12</b>    | <b>66.87</b> | <b>1288.52</b> | <b>0.07</b> |
| 1st 2-week          | 0.37                 | 0.31        | 4.12         | 0.01        | 19.60           | 93.58        | 1288.52        | 0.07        |
| 2nd 2-week          | 0.44                 | 0.20        | 1.77         | 0.15        | 3.43            | 21.83        | 312.23         | 0.08        |
| <b>June 24</b>      | <b>3.16</b>          | <b>2.64</b> | <b>19.80</b> | <b>0.38</b> | <b>6.36</b>     | <b>7.41</b>  | <b>41.56</b>   | <b>0.32</b> |
| 1st 2-week          | 3.39                 | 2.42        | 14.31        | 0.38        | 7.46            | 5.96         | 35.54          | 0.32        |
| 2nd 2-week          | 2.93                 | 2.83        | 19.80        | 0.58        | 5.26            | 8.48         | 41.56          | 0.32        |

Table S2a. In this table monthly and 2-weekly statistics (mean, standard deviation, maximum and minimum) from chlorophyll-a and turbidity are presented.

|                     | Chlorophyll-a (ug/L) |             |              |             | Turbidity (FTU) |               |                |             |
|---------------------|----------------------|-------------|--------------|-------------|-----------------|---------------|----------------|-------------|
|                     | $\bar{x}$            | $\sigma$    | Máx          | Mín         | $\bar{x}$       | $\sigma$      | Máx            | Mín         |
| <b>July 24</b>      | <b>9.75</b>          | <b>4.37</b> | <b>19.92</b> | <b>1.90</b> | <b>7.19</b>     | <b>33.31</b>  | <b>632.29</b>  | <b>0.56</b> |
| 1st 2-week          | 7.49                 | 3.80        | 19.61        | 1.90        | 4.55            | 33.61         | 632.29         | 0.56        |
| 2nd 2-week          | 12.13                | 3.61        | 19.92        | 4.86        | 9.95            | 32.81         | 557.45         | 2.34        |
| <b>August 24</b>    | <b>11.38</b>         | <b>3.32</b> | <b>19.97</b> | <b>4.50</b> | <b>5.77</b>     | <b>12.39</b>  | <b>176.75</b>  | <b>1.29</b> |
| 1st 2-week          | 10.74                | 3.35        | 19.97        | 4.50        | 7.08            | 13.30         | 176.75         | 1.74        |
| 2nd 2-week          | 12.27                | 3.07        | 19.88        | 7.76        | 3.94            | 10.78         | 154.75         | 1.29        |
| <b>September 24</b> | <b>0.68</b>          | <b>1.84</b> | <b>19.74</b> | <b>0.01</b> | <b>25.19</b>    | <b>104.44</b> | <b>1047.38</b> | <b>0.06</b> |
| 1st 2-week          | 0.86                 | 2.70        | 19.74        | 0.01        | 21.66           | 77.40         | 873.97         | 0.06        |
| 2nd 2-week          | 0.53                 | 0.24        | 3.25         | 0.03        | 28.14           | 122.61        | 1047.38        | 0.09        |
| <b>October 24</b>   | <b>0.57</b>          | <b>0.71</b> | <b>17.53</b> | <b>0.15</b> | <b>4.56</b>     | <b>50.84</b>  | <b>890.50</b>  | <b>0.09</b> |
| 1st 2-week          | 0.62                 | 1.02        | 17.53        | 0.15        | 6.62            | 66.94         | 890.50         | 0.09        |
| 2nd 2-week          | 0.51                 | 0.12        | 1.01         | 0.34        | 2.64            | 28.68         | 472.94         | 0.09        |
| <b>November 24</b>  | <b>0.61</b>          | <b>0.54</b> | <b>14.72</b> | <b>0.32</b> | <b>0.26</b>     | <b>0.16</b>   | <b>2.22</b>    | <b>0.12</b> |
| 1st 2-week          | 0.63                 | 0.75        | 14.72        | 0.35        | 0.22            | 0.15          | 2.22           | 0.12        |
| 2nd 2-week          | 0.59                 | 0.14        | 1.42         | 0.32        | 0.30            | 0.16          | 1.36           | 0.15        |
| <b>December 24</b>  | <b>0.67</b>          | <b>0.43</b> | <b>8.02</b>  | <b>0.28</b> | <b>0.96</b>     | <b>3.59</b>   | <b>88.74</b>   | <b>0.19</b> |
| 1st 2-week          | 0.57                 | 0.46        | 8.02         | 0.28        | 0.72            | 4.85          | 88.74          | 0.19        |
| 2nd 2-week          | 0.77                 | 0.38        | 6.62         | 0.51        | 1.19            | 1.68          | 26.02          | 0.30        |
| <b>January 25</b>   | <b>1.79</b>          | <b>2.68</b> | <b>19.77</b> | <b>0.41</b> | <b>8.13</b>     | <b>29.11</b>  | <b>588.83</b>  | <b>0.51</b> |
| 1st 2-week          | 1.37                 | 1.52        | 18.36        | 0.50        | 4.38            | 10.60         | 114.65         | 0.75        |
| 2nd 2-week          | 2.20                 | 3.41        | 19.77        | 0.41        | 11.73           | 39.09         | 588.83         | 0.51        |
| <b>February 25</b>  | <b>0.66</b>          | <b>0.77</b> | <b>11.16</b> | <b>0.36</b> | <b>2.01</b>     | <b>5.67</b>   | <b>109.41</b>  | <b>0.52</b> |
| 1st 2-week          | 0.68                 | 0.87        | 11.16        | 0.36        | 1.51            | 6.73          | 109.41         | 0.52        |
| 2nd 2-week          | 0.63                 | 0.62        | 8.82         | 0.42        | 2.58            | 4.05          | 65.61          | 1.38        |
| <b>March 25</b>     | <b>0.82</b>          | <b>0.44</b> | <b>5.75</b>  | <b>0.53</b> | <b>3.94</b>     | <b>2.01</b>   | <b>31.95</b>   | <b>2.44</b> |
| 1st 2-week          | 0.82                 | 0.44        | 5.75         | 0.53        | 3.94            | 2.01          | 31.95          | 2.44        |

Table S2b. In this table monthly and 2-weekly statistics (mean, standard deviation, maximum and minimum) from chlorophyll-a and turbidity are presented.

| <b>Spearman test. Current speed vs Turbidity</b> |               |           |
|--------------------------------------------------|---------------|-----------|
| Variables                                        | Current Speed | Turbidity |
| Current speed                                    | <b>1</b>      | -0.014    |
| Turbidity                                        | -0.014        | <b>1</b>  |
| <b><math>\rho = -0.014</math></b>                |               |           |

| <b>Spearman test. Chlorophyll-a vs turbidity</b> |          |           |
|--------------------------------------------------|----------|-----------|
| Variables                                        | CHL-A    | Turbidity |
| CHL-A                                            | <b>1</b> | 0.761     |
| Turbidity                                        | 0.761    | <b>1</b>  |
| <b><math>\rho = 0.761</math></b>                 |          |           |

Table S3. Correlation matrix showing Spearman correlation results. Left: correlation between current speed and turbidity (September 2023 to September 2024). Right: correlation between chlorophyll-a and turbidity (September 2023 to March 2025).
